# Supplementary material for: Additive engineering strategies for improved interfacial stability in lithium metal batteries
Source: Royal Society of Chemistry journal article supplement (doi:10.1039/d4ee02479f), 2024-01-01
Supplement: d4ee02479f1.pdf [file d4ee02479f1.pdf]

## Electronic Supplementary Information (ESI)

### Additive engineering strategies for improved interfacial stability in lithium metal batteries

Kun Ryu,<sup>‡a,b</sup> Kyungbin Lee,<sup>‡a</sup> Jeonghoon Lim,<sup>c</sup> Michael J. Lee,<sup>a</sup> Keun-Hee Kim,<sup>a</sup> Un Hwan Lee,<sup>d</sup> Bernardine Rinkel,<sup>c</sup> Kyungmo Kim,<sup>a</sup> Soohyun Kim,<sup>e</sup> Dayoung Kim,<sup>e</sup> Dongsek Shin,<sup>e</sup> Bryan McCloskey,<sup>c</sup> Joonhee Kang,<sup>d\*</sup> and Seung Woo Lee<sup>a\*</sup>

<sup>a</sup>George W. Woodruff School of Mechanical Engineering, Georgia Institute of Technology, Atlanta, GA, 30332, USA.

<sup>b</sup>Pritzker School of Molecular Engineering, University of Chicago, Chicago, IL, 60637, USA.

<sup>c</sup>Department of Chemical and Biomolecular Engineering, University of California, Berkeley, CA, 94720, USA.

<sup>d</sup>Department of Nanoenergy Engineering, Pusan National University, Busan, 46241, Republic of Korea.

<sup>e</sup>LG Energy Solution, Ltd., LG Science Park, Seoul 07796, Korea

Co-correspondence: [seung.lee@me.gatech.edu](mailto:seung.lee@me.gatech.edu), [j.kang@pusan.ac.kr](mailto:j.kang@pusan.ac.kr)

## Supplementary Experimental Section

### Electrolyte and electrode preparation

For the ether electrolytes, 1M lithium bis(fluorosulfonyl)imide (LiFSI, Solvionic) was dissolved in anhydrous tetrahydrofuran (THF, Sigma-Aldrich). Tetrabutylammonium tetrafluoroborate (TBATFB, Sigma-Aldrich) were processed using the following protocols to remove any excess water. After vacuum drying in 80 °C for 48 hours, TBATFB was dissolved in THF and then refluxed in Argon environment for 2 hours. The salt was subsequently recrystallized in anhydrous ethyl acetate (Sigma-Aldrich) to obtain white crystals. Then, 0.1 M, 0.5 M, and 1.0 M concentrations of TBATFB were added to the 1 M LiFSI/THF electrolytes. The LiFePO<sub>4</sub> (LFP, MSE Supplies) and single crystal LiNi<sub>0.88</sub>Co<sub>0.09</sub>Al<sub>0.03</sub>O<sub>2</sub> (NCA-88, MSE Supplies) cathodes were prepared using a slurry cast method. Initially, a slurry was created by mixing the active material, Super P carbon black, and Polyvinylidene fluoride (PVDF) binder (MSE Supplies) in a mass ratio of 90:5:5 in anhydrous N-methyl pyrrolidone (NMP, Sigma-Aldrich). The slurry was then casted using a doctor blade method onto aluminium foil and punched into 13 mm disks. Subsequently, the cathodes were pressed with roll press at 90 °C. The electrodes underwent vacuum drying for at least 24 hours at 65 °C prior to cell assembly.

### Electrochemical Characterization

All tests were conducted using 2032-type coin cells assembled in an Argon-filled glovebox (MBRAUN, O<sub>2</sub> and H<sub>2</sub>O < 0.1 ppm) with polypropylene (Celgard 2325) as the separator. Li||Li symmetric cells and Li||Cu asymmetric cells were assembled using a 250 μm Li chip as the reference and counter electrode. The exchange current density was determined using the Tafel plot and the Butler-Volmer equation. To generate a Tafel plot, the Li||Li cell was scanned at a constant rate of 0.5 mV s<sup>-1</sup> within a voltage range of -0.2 and 0.2 V vs. Li/Li<sup>+</sup>. The overpotentials needed

for the Butler-Volmer equations were obtained through galvanostatic charge/discharge of Li||Li cells, using currents ranging from 20 to 100  $\mu\text{A}$ . The passivation stability of the Li metal anode was assessed by setting up a Li||Cu cell at 0 V vs. Li/Li<sup>+</sup> and monitoring the leakage current for 10 hours. Calendar ageing of Li was performed by initially plating and stripping 5 mAh cm<sup>-2</sup> of Li, followed by another plating 5 mAh cm<sup>-2</sup> of Li. The cells were then allowed to rest for 0, 1, and 5 days before being stripped to 1 V vs. Li/Li<sup>+</sup>. Li||LFP full cell batteries were tested using a 35- $\mu\text{m}$ -thick Li anode and a 4 mAh cm<sup>-2</sup> loading LFP cathode, within a voltage range of 2.5 – 4.0 V vs. Li/Li<sup>+</sup>. Li||NCA-88 full-cell batteries were tested using either a 35- $\mu\text{m}$ -thick or 50- $\mu\text{m}$ -thick Li anode, coupled with a 2 mAh cm<sup>-2</sup> or 4 mAh cm<sup>-2</sup> NCA-88 cathode, within the voltage range of 2.7 – 4.3 V vs. Li/Li<sup>+</sup>. Anode-free Cu||NCA-88 cells were assembled using Cu foil as the anode and a 2 mAh cm<sup>-2</sup> NCA-88 cathode within the same voltage range. Electrochemical floating test was performed by placing a Li||NCA-88 cell at 4.3 V vs. Li/Li<sup>+</sup> and measuring the leakage current. Galvanostatic Intermittent Titration Technique (GITT) was performed by charging and discharging at 0.02 C with 45-minute rest intervals. Electrochemical impedance spectroscopy (EIS) experiments were carried out from 10<sup>-2</sup> Hz to 10<sup>5</sup> Hz using a 10-mV peak voltage at open-circuit voltage. The ionic conductivity and transference number of the electrolytes were measured using EIS with SS||SS and Li||Li symmetric cells, respectively. The transference number was determined using the Bruce-Vincent method with a polarization voltage and time of 10 mV and 2 hours. Identical conditions were used for measuring the total impedance of Li||Li and Li||NCA-88 full cells. BioLogic VMP3 and Arbin battery cyclers were used for all electrochemical analysis.

## **Materials Characterization**

The morphology of the Li metal deposits was examined using scanning electron microscopy (SEM, SU-8230). The electrolyte's solvation structure was analyzed using Raman Spectroscopy

(Renishaw Qontor Dispersive Raman Spectrometer). The chemical composition of the SEI and CEI was investigated using X-ray photoelectron spectroscopy (Thermo Scientific K-alpha XPS instrument) with air-tight transfer. High-resolution XPS of Li 1s, C 1s, O 1s, F 1s, and S 2p spectra were fitted using XPSPEAKS 4.1. One-dimensional  $^7\text{Li}$ ,  $^{19}\text{F}\{^1\text{H}\}$  and  $^{17}\text{O}$  NMR spectra were recorded on a Bruker AVANCE III HD 14.1 T ( $\omega_{1\text{H}} = 600$  MHz) spectrometer using a BB Prodigy CryoProbe. All spectra were internally referenced by adding a glass capillary containing an appropriate reference solution:  $^7\text{Li}$  NMR spectra were referenced to LiCl (1 M in  $\text{D}_2\text{O}$ ) at 0.0 ppm,  $^{19}\text{F}$  NMR spectra were referenced to  $\text{LiPF}_6$  (1 M in EC/DMC; 1:1 v/v) at  $-74.5$  ppm ( $\delta^{19}\text{F}$ ), and  $^{17}\text{O}$  spectra were referenced to  $\text{D}_2\text{O}$  at 0.0 ppm.

### Computational Details

We employed the Vienna ab-initio simulation package (VASP) for conducting density functional theory (DFT) computations.<sup>1,2</sup> The projector augmented wave (PAW) approach was utilized for core electron representation,<sup>3</sup> and the determination of the exchange-correlation functional relied on the Perdew-Burke-Ernzerhof (PBE) method within the framework of the generalized gradient approximation (GGA).<sup>4</sup> We selected a plane-wave cutoff energy of 400 eV and enforced an energy convergence threshold of  $10^{-5}$  eV, continuing computations until atomic forces diminished to below  $0.02$  eV  $\text{\AA}^{-1}$ . For the optimization of molecular adsorption structures, we integrated the Brillouin zone in reciprocal space using a  $1 \times 1 \times 1$  k-point grid, and we also utilized a  $1 \times 1 \times 1$  k-point grid for ab-initio molecular dynamics (AIMD) calculations to enhance computational speed. Spin polarization was considered in all calculations except for AIMD simulations. The Li (100) surface was modeled with a  $6 \times 6$  supercell containing 3 layers, with the bottom two layers fixed to represent the bulk region. For surface AIMD calculations, we performed 50,000 steps with a time step of 1 fs under the condition of 300K temperature. To prevent interactions due to periodic

boundary conditions during relaxations involving molecules and surfaces, a vacuum of at least 15 Å was included. For computing solvation structures in the electrolytes, we employed the universal graph deep learning interatomic potential (M3GNet) for fast computations.<sup>5</sup> The conventional ether electrolyte (CEE) was modeled with 5 LiFSI and 60 THF molecules, while the additive-containing electrolyte (ACE) included an additional TBATFB in addition to CEE. Molecular dynamics simulations for observing electrolyte solvation structures were performed for 30 ps at a temperature of 350 K.

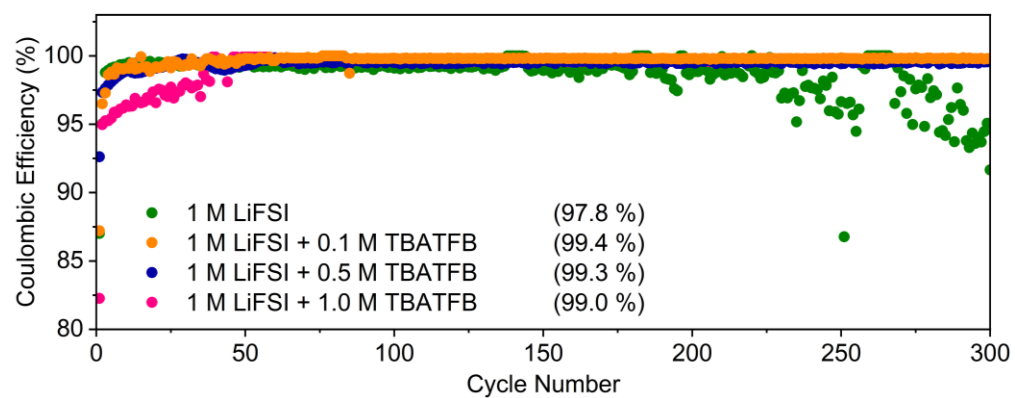

**Fig. S1.** Li plating/stripping CEs for Li||Cu asymmetric cells at  $1 \text{ mA cm}^{-2}$  and  $1 \text{ mAh cm}^{-2}$ .

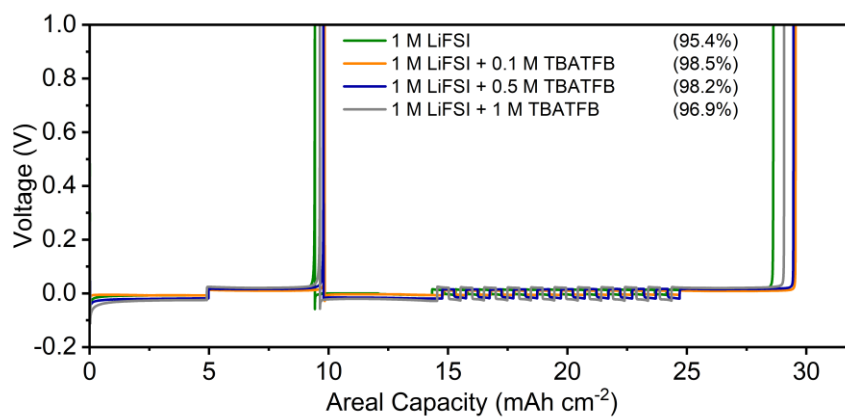

**Fig. S2.** Li plating/stripping protocol for Li||Cu asymmetric cells at 0.5 mA cm<sup>-2</sup> and 5 mAh cm<sup>-2</sup>.

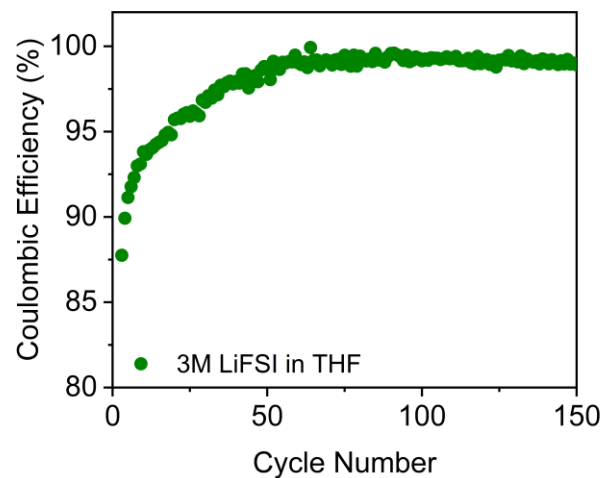

**Fig. S3.** Li plating/stripping CEs for the Li||Cu asymmetric cell using a high-concentration electrolyte of 3 M LiFSI in THF at  $1 \text{ mA cm}^{-2}$  and  $1 \text{ mAh cm}^{-2}$ .



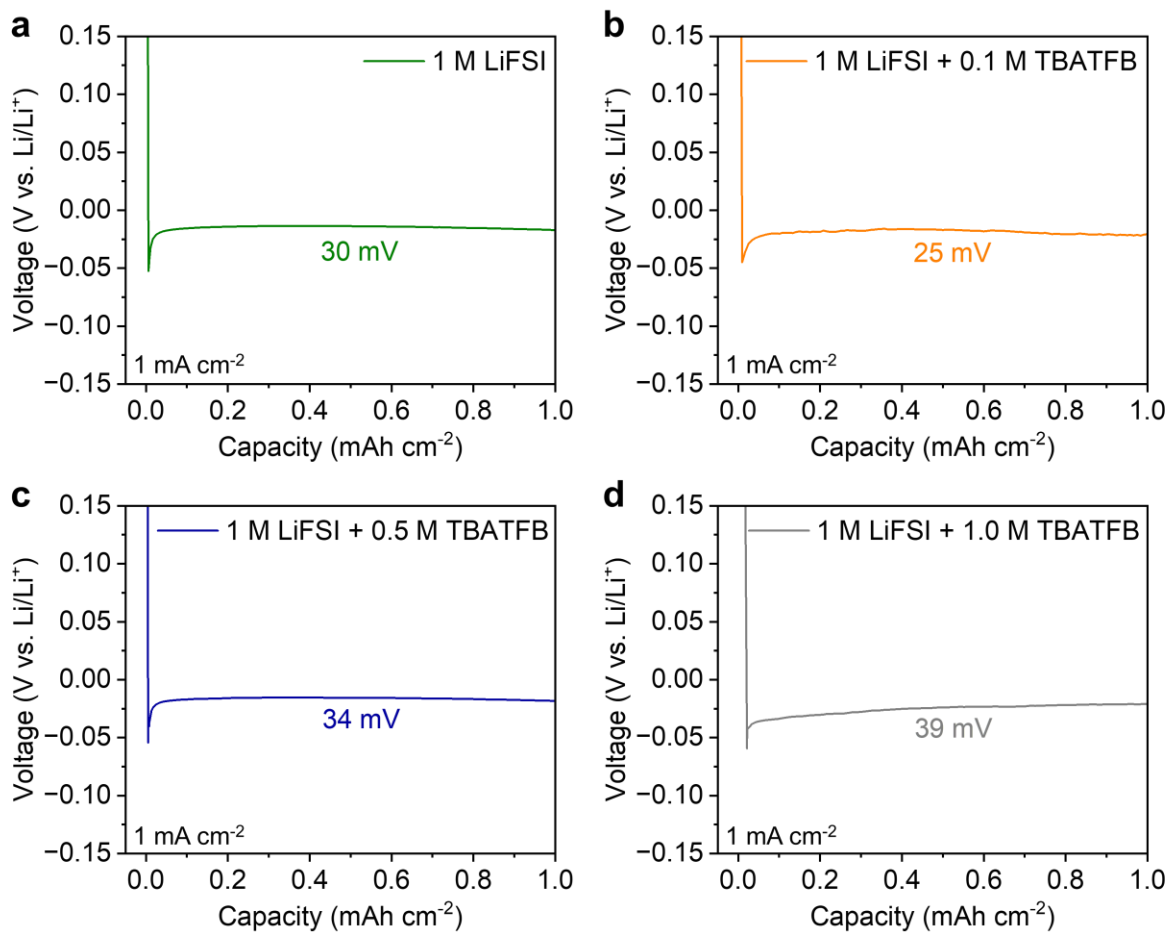

**Fig. S4.** Nucleation overpotential profiles of different electrolytes at current density of  $1 \text{ mA cm}^{-2}$ .

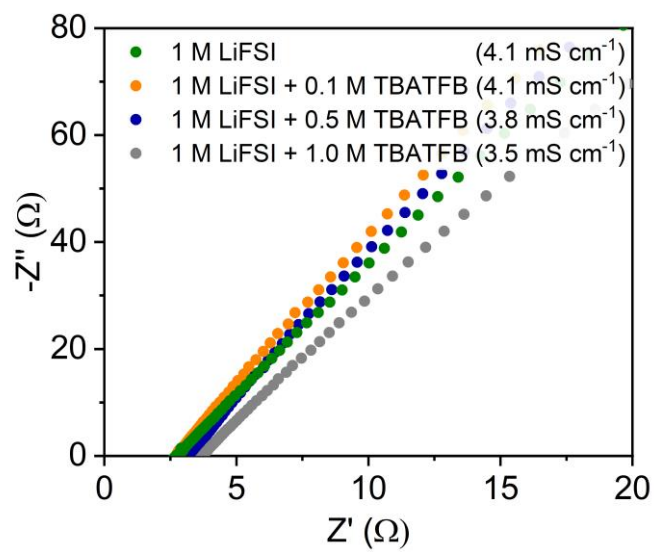

**Fig. S5.** Ionic conductivity measurements of different electrolytes.

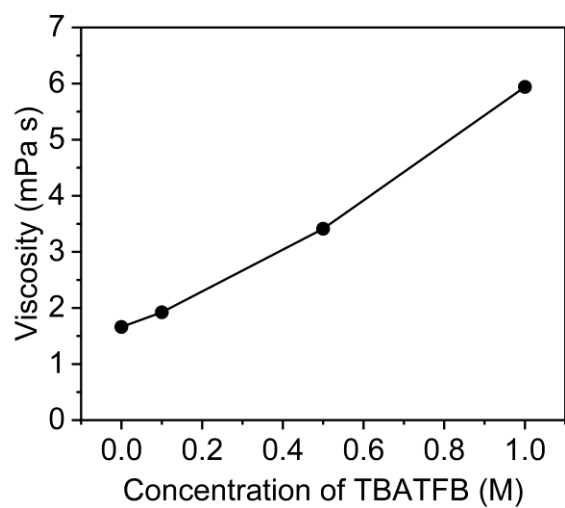

**Fig. S6.** Viscosity of different electrolytes measured as a function of TBATFB concentration in 1M LiFSI in THF.

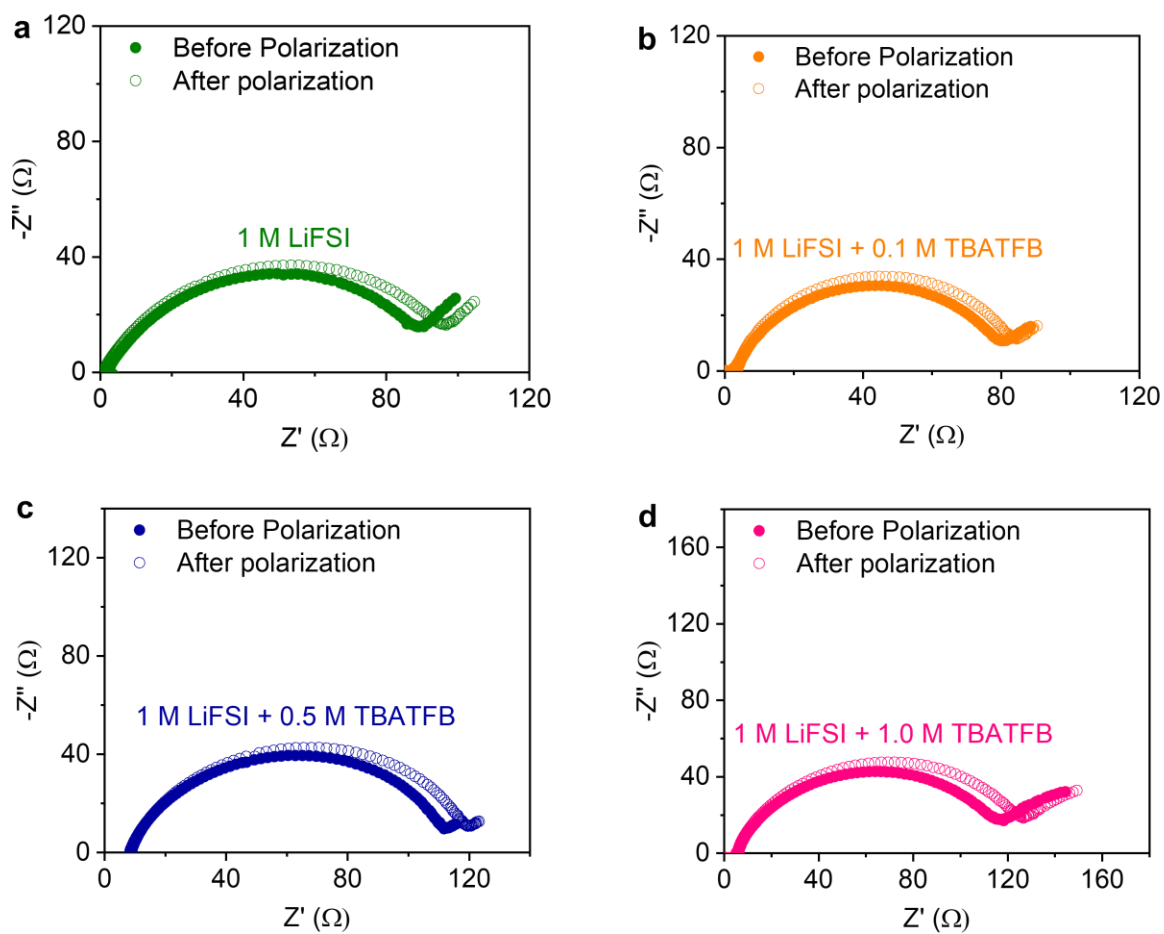

**Fig. S7.** Nyquist plots of Li||Li symmetric cells before and after polarization of 10 mV.

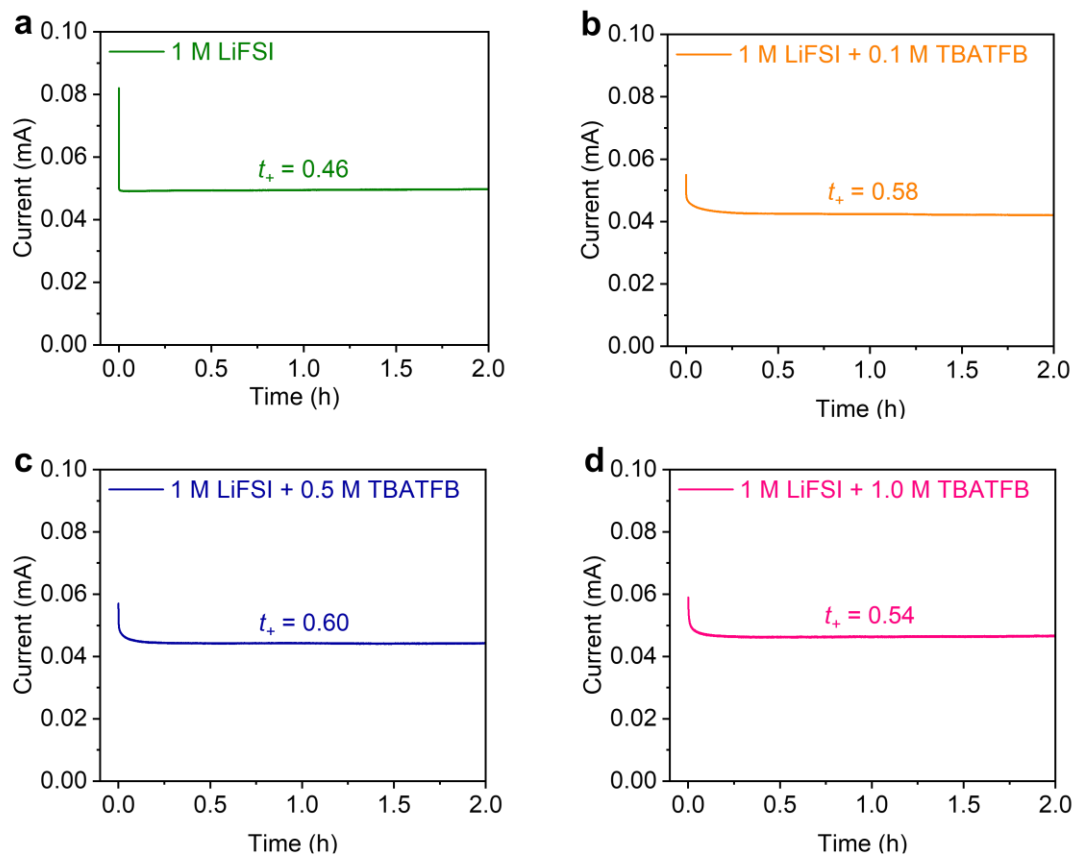

**Fig. S8.** Steady state current measurement of Li||Li symmetric cells under 10 mV for 2 hours.

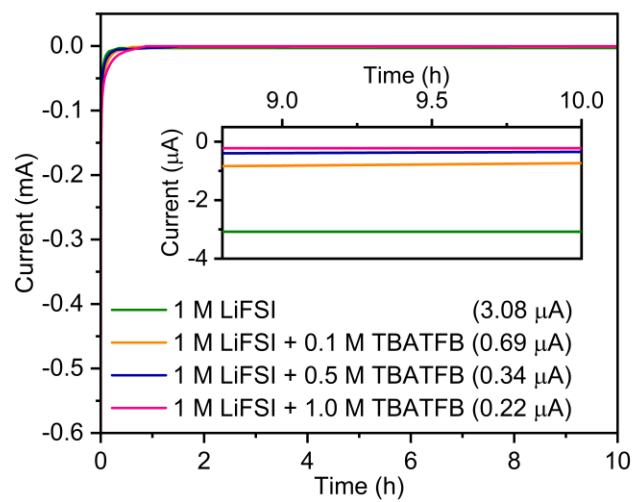

**Fig. S9.** Passivation leakage current measurement of Li||Cu cells at 0 V vs. Li/Li<sup>+</sup> for 10 hours.

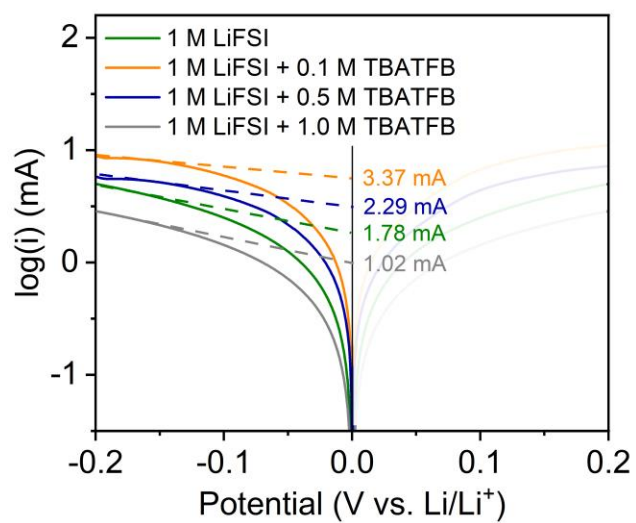

**Fig. S10.** Tafel plot of Li||Li symmetric cells measured between - 0.2 and 0.2 V vs. Li/Li<sup>+</sup> under scan rate of 0.5 mV s<sup>-1</sup>.

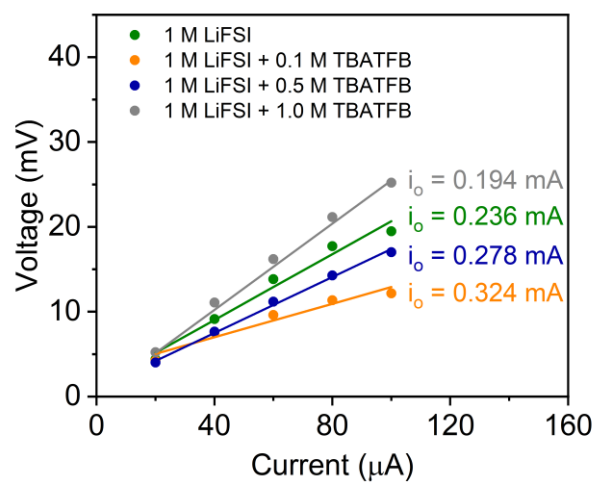

**Fig. S11.** Overpotentials of galvanostatic charge/discharge cycles under low currents, ranging from 20 to 100  $\mu\text{A}$ .



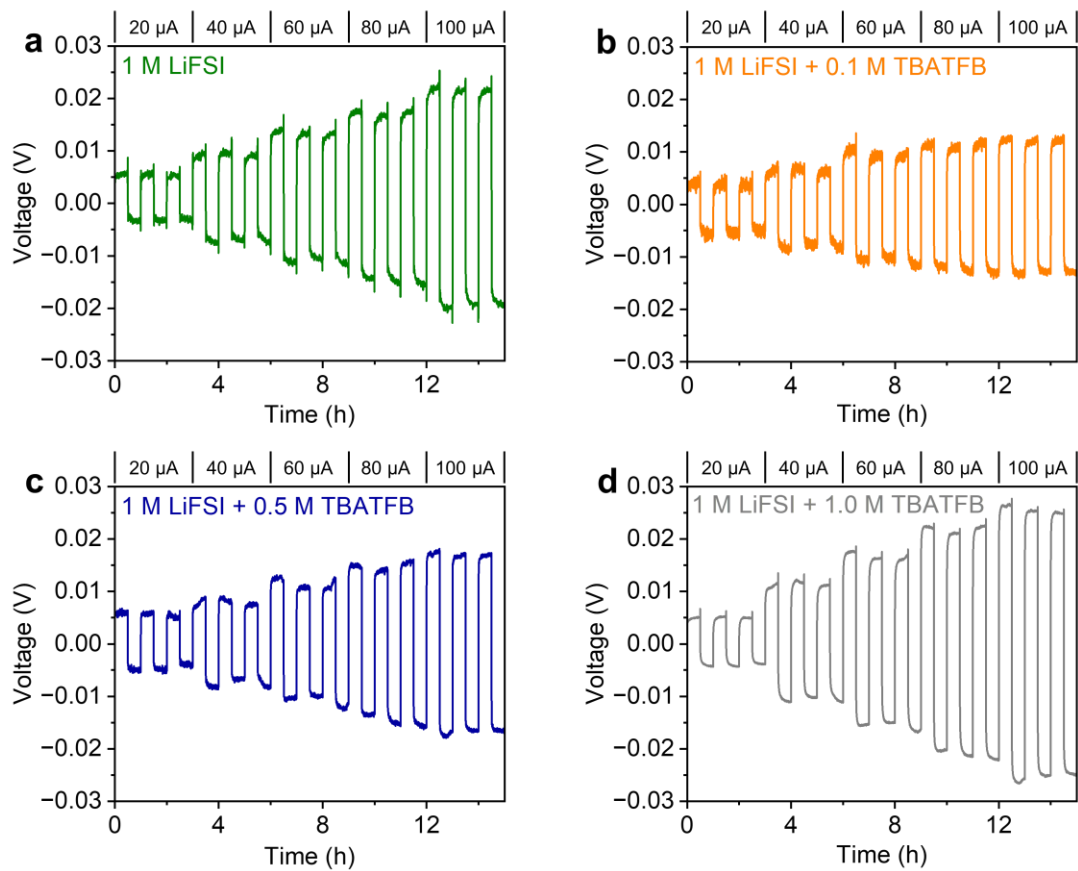

**Fig. S12.** Voltage profiles of galvanostatic charge/discharge under low currents, ranging from 20 to 100  $\mu\text{A}$ .

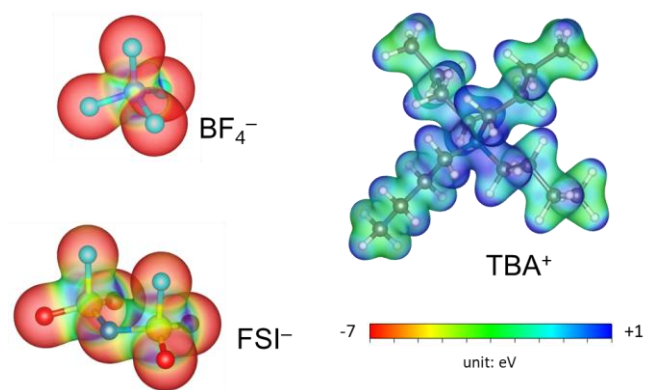

**Fig. S13.** Electrostatic potential of  $\text{BF}_4^-$ ,  $\text{FSI}^-$ , and  $\text{TBA}^+$  ions calculated using density functional theory (DFT).

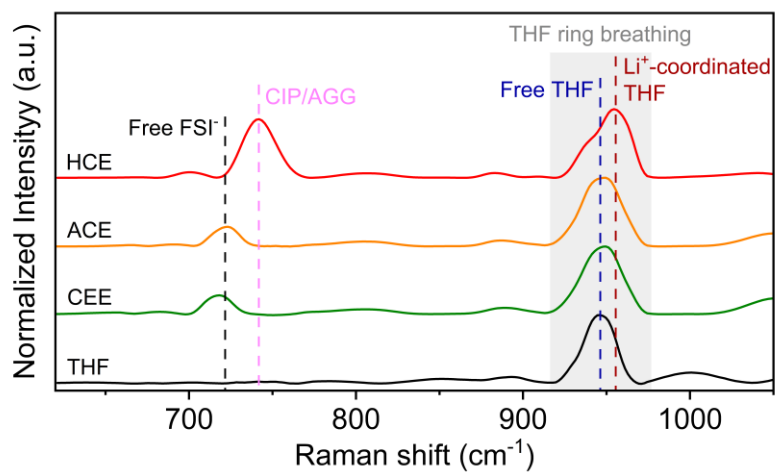

**Fig. S14.** Raman spectra of pure THF, CEE, ACE, and high-concentration electrolyte (HCE, 3 M LiFSI in THF). HCE was added to show a clear difference between the free FSI/THF and coordinated FSI/THF.

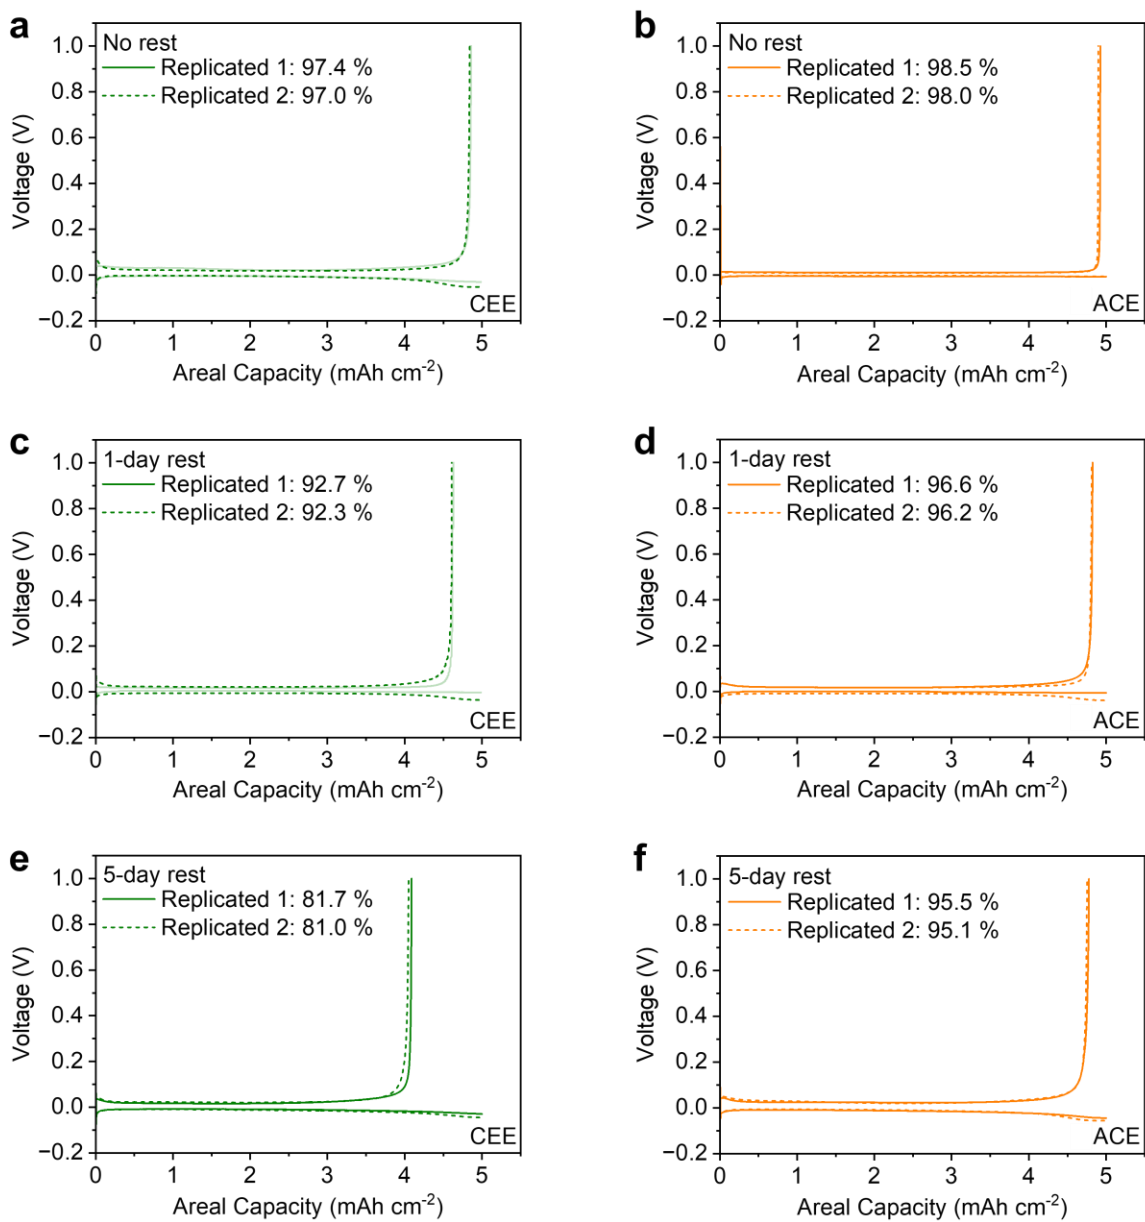

**Figure S15.** Voltage profiles of the second plating and stripping profiles for (a,c,e) CEE and (b,d,f) ACE. Cells were either (a,b) not rested, (c,d) rested for a day, (e,f) or rested for 5 days.

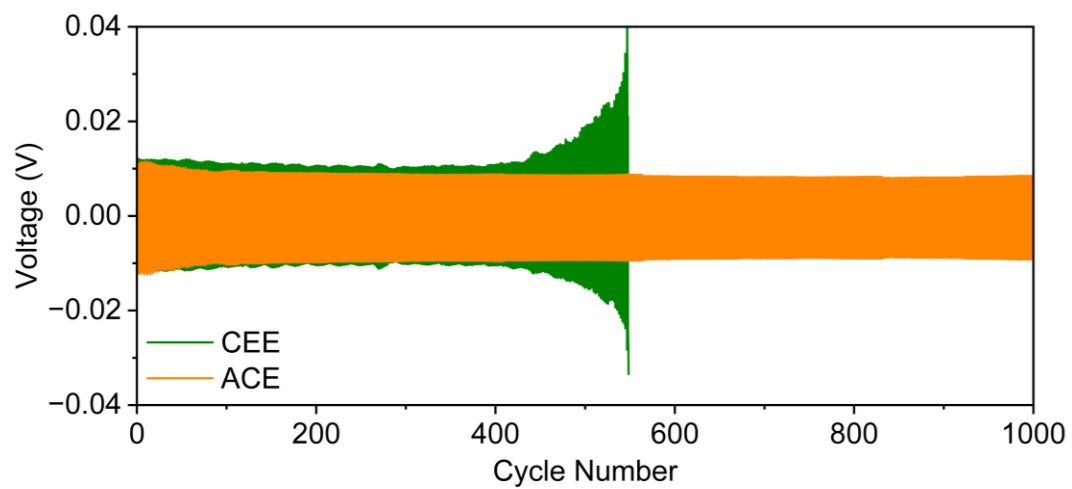

**Fig. S16.** Cycling stability of Li||Li symmetric cells at  $1 \text{ mA cm}^{-2}$  and  $1 \text{ mAh cm}^{-2}$ .

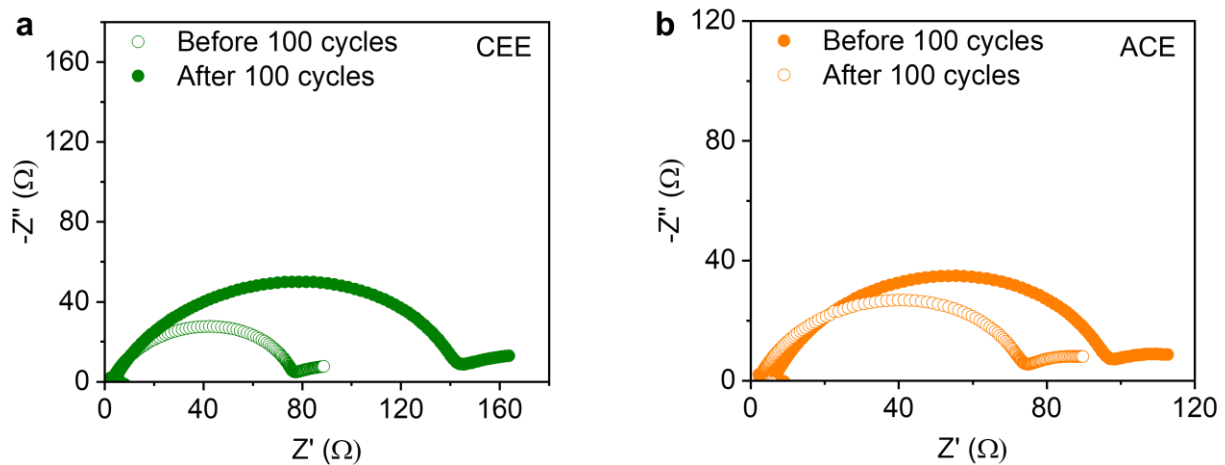

**Fig. S17.** EIS of Li||Li symmetric cells before and after 100 cycles. **(a)** CEE and **(b)** ACE electrolytes were used to cycle Li||Li symmetric cells for 100 cycles at  $1 \text{ mA cm}^{-2}$  and  $1 \text{ mAh cm}^{-2}$ .

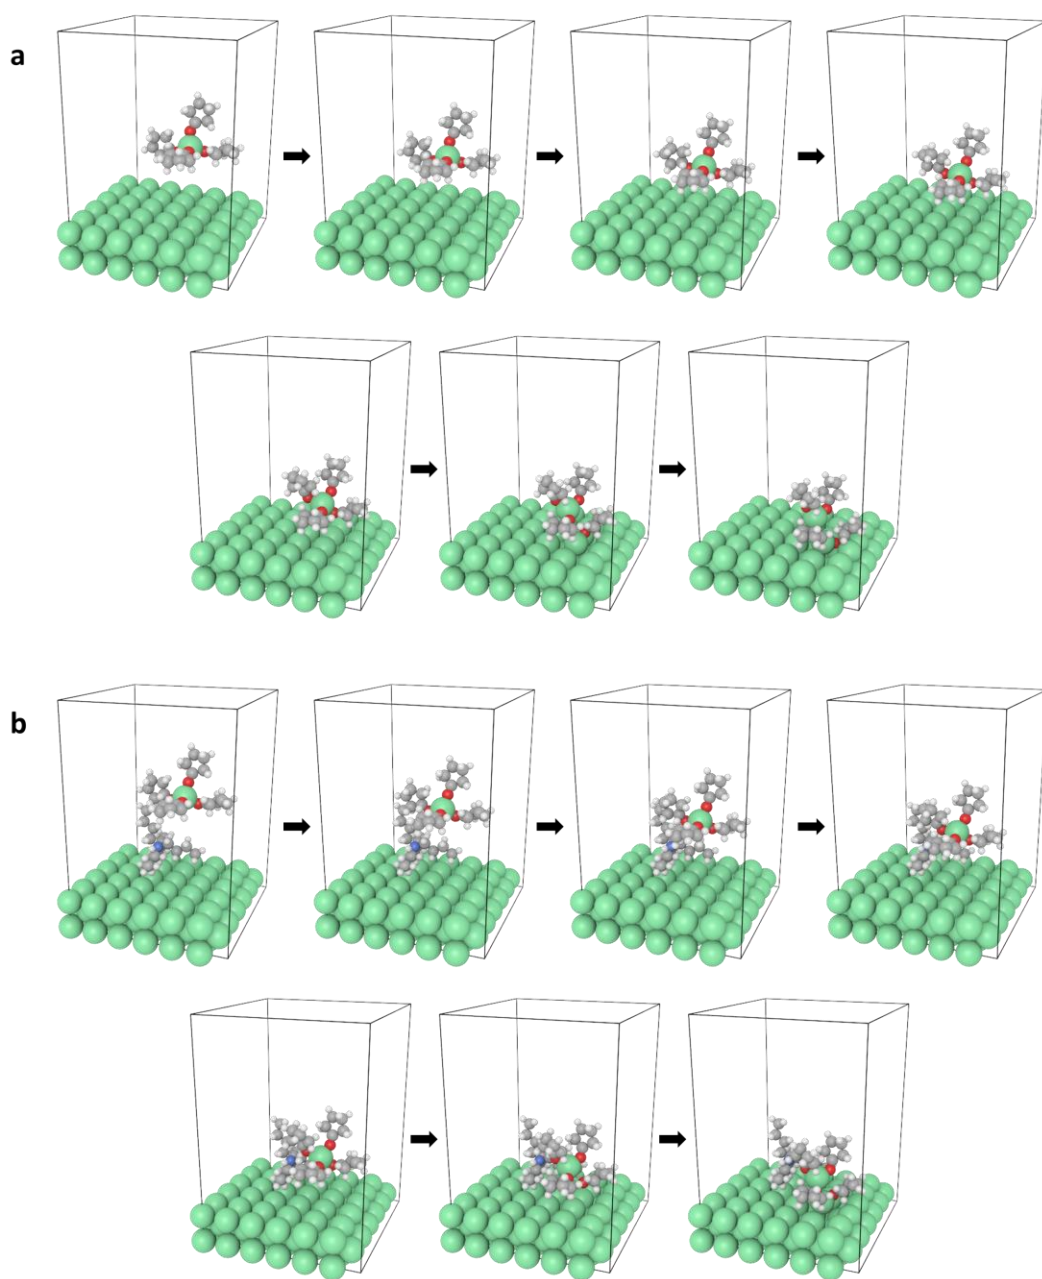

**Fig. S18.** Snapshots of solvated  $\text{Li}^+$  as it progresses towards Li metal anode (a) without and (b) with TBA<sup>+</sup> cation layer.

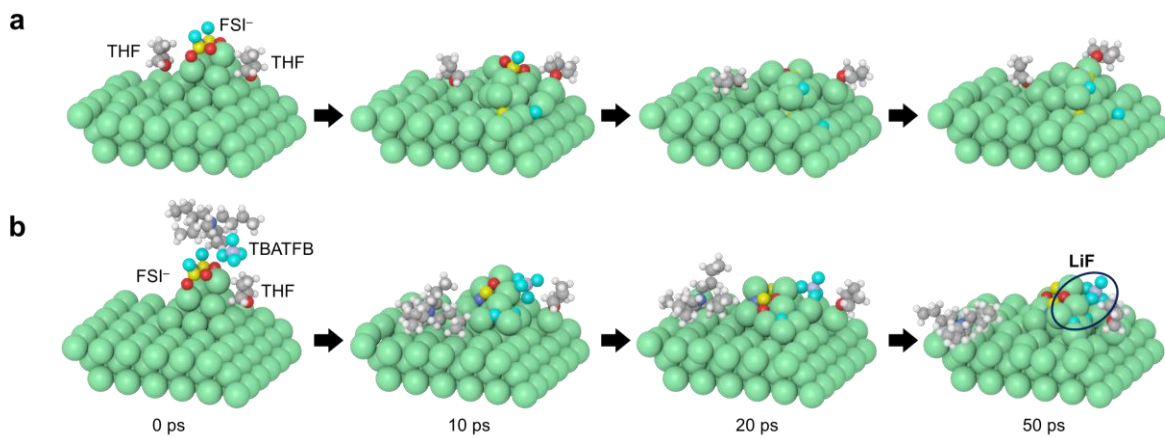

**Fig. S19.** AIMD simulations of the solvent and salt decomposition process **(a)** without and **(b)** with TBATFB.



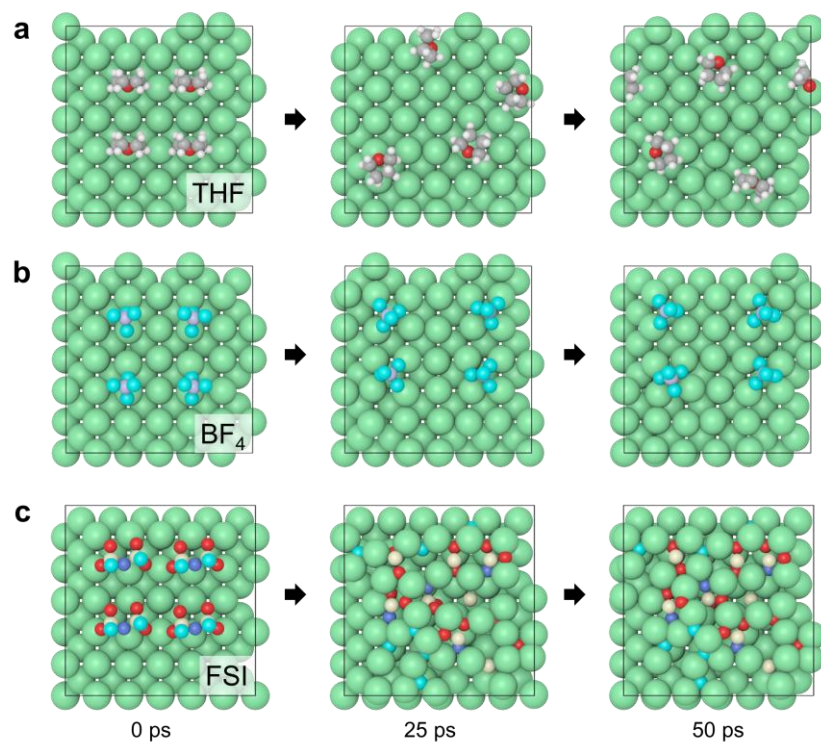

**Fig. S20.** AIMD simulations of (a) THF, (b) BF<sub>4</sub><sup>-</sup>, and (c) FSI<sup>-</sup> decomposition process over 50 ps.

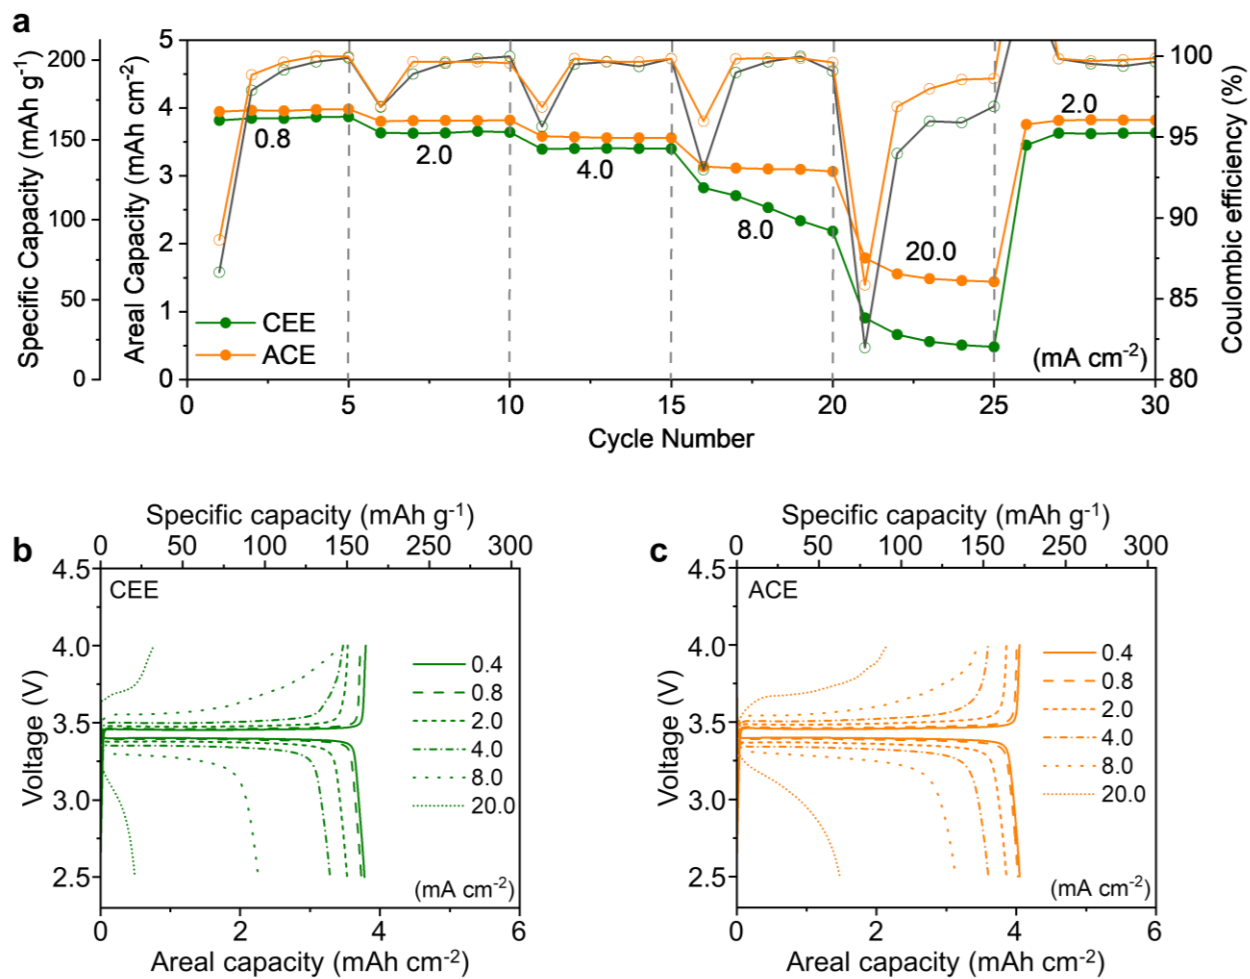

**Fig. S21.** (a) Rate performance of the LFP cathode and (b and c) corresponding voltage profiles.

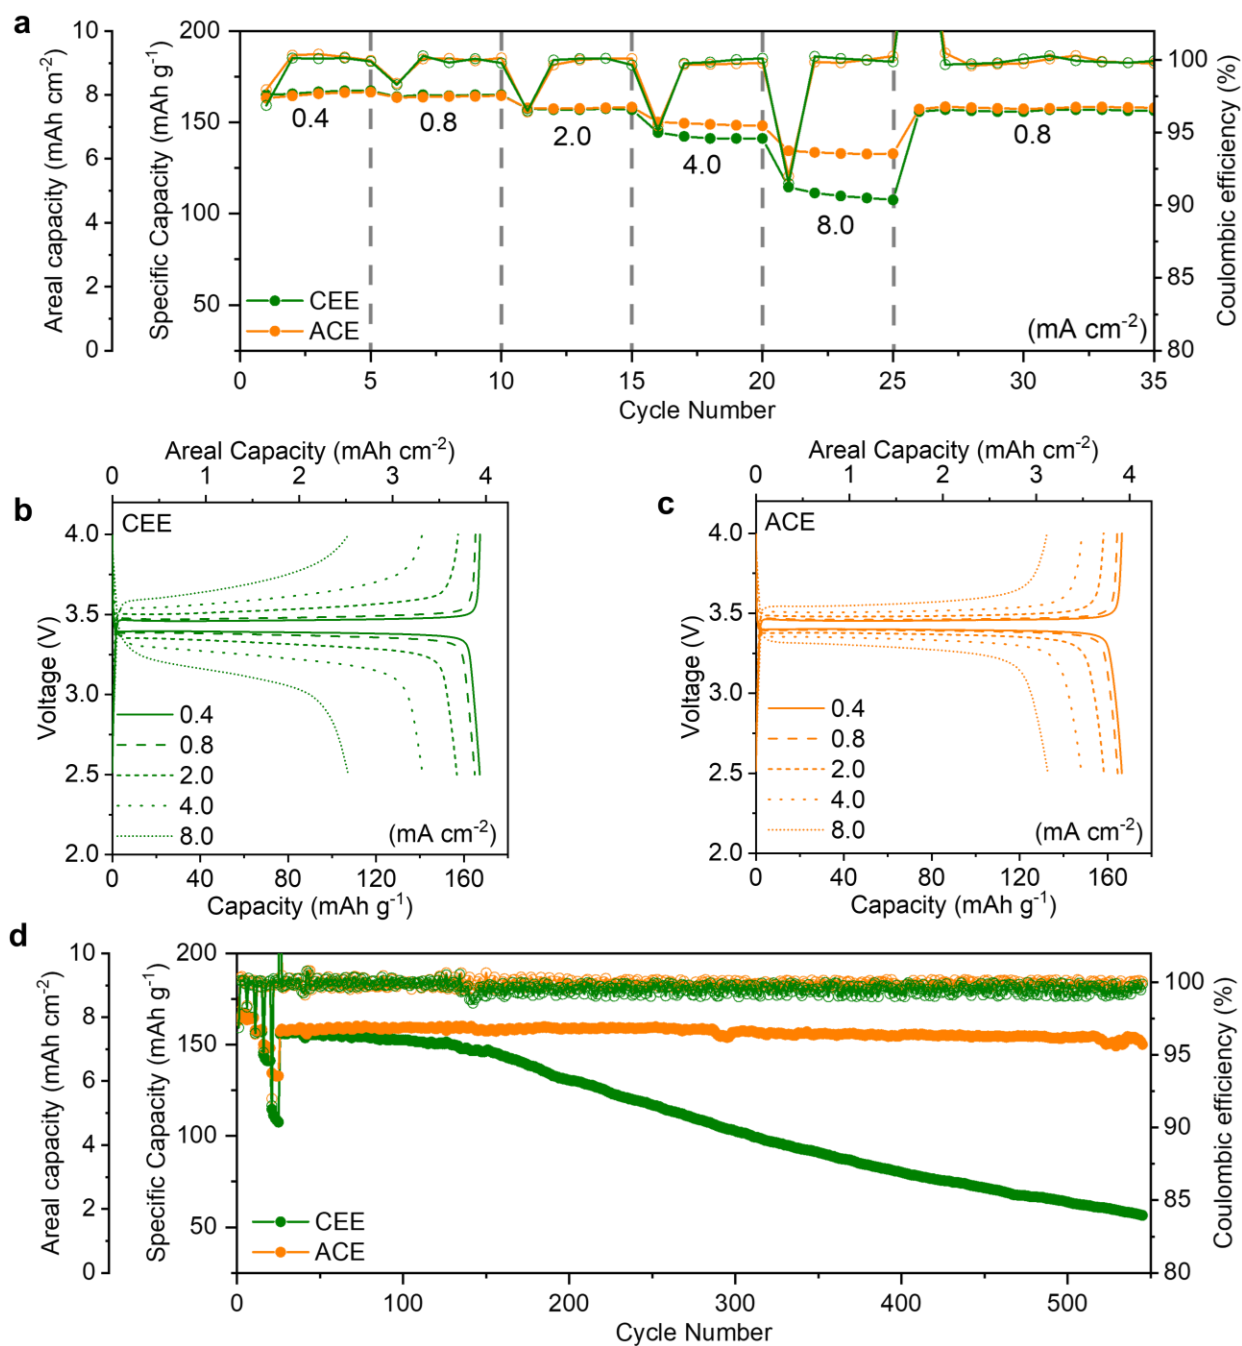

**Fig. S22.** (a) Rate performance of the LFP cathode and (b) and (c) corresponding voltage profiles. (d) Cycling performance of the LFP cathode at  $0.8 \text{ mA cm}^{-2}$ .

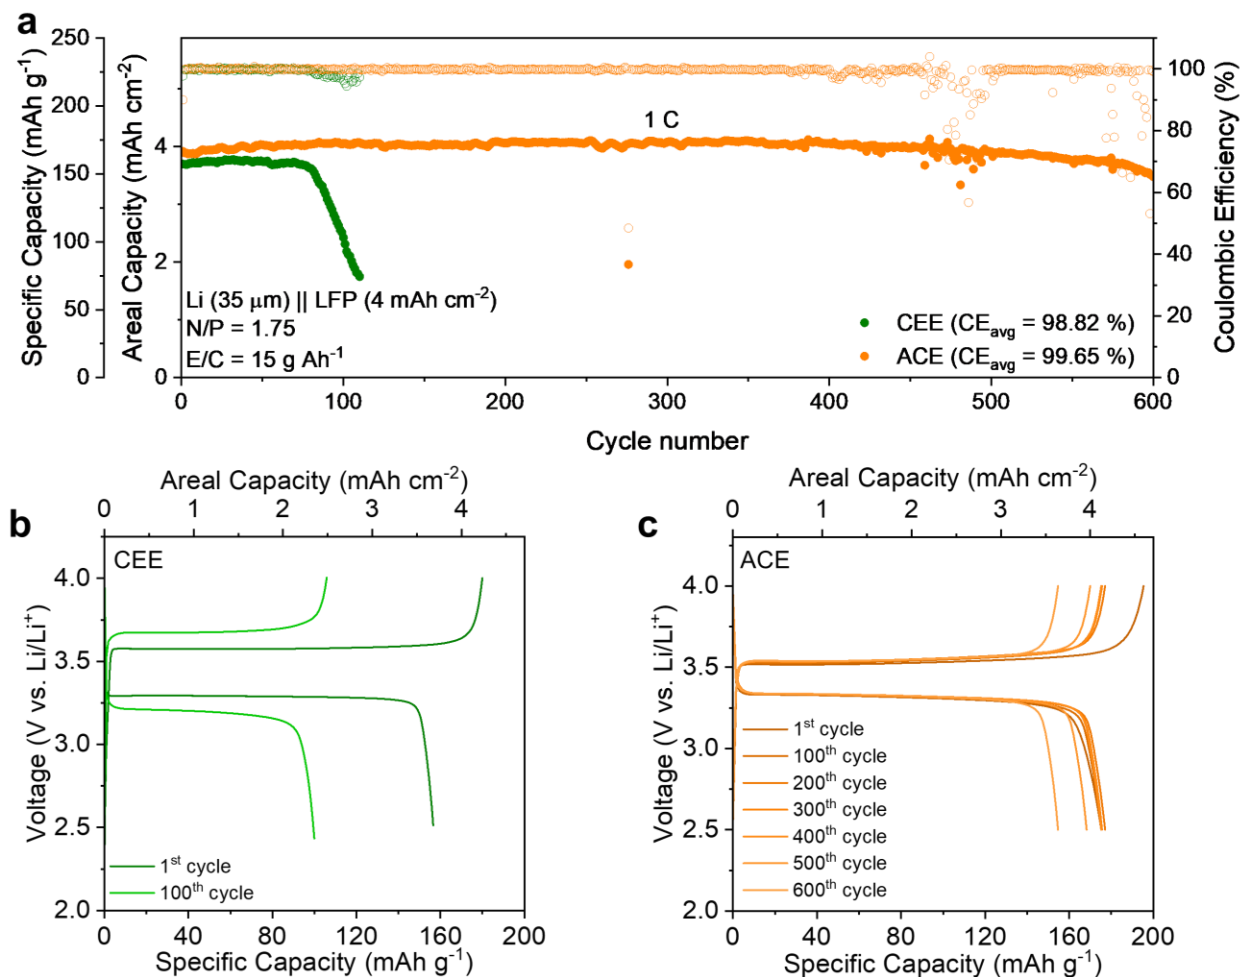

**Fig. S23.** (a) Long-cycling performance of Li||LFP cells and (b and c) corresponding voltage profiles. Conditions: the  $35 \mu\text{m}$  LMA paired with the  $4 \text{ mAh cm}^{-2}$  LFP cathode, with N/P ratio of 1.75 and E/C ratio of  $15 \text{ g Ah}^{-1}$ .

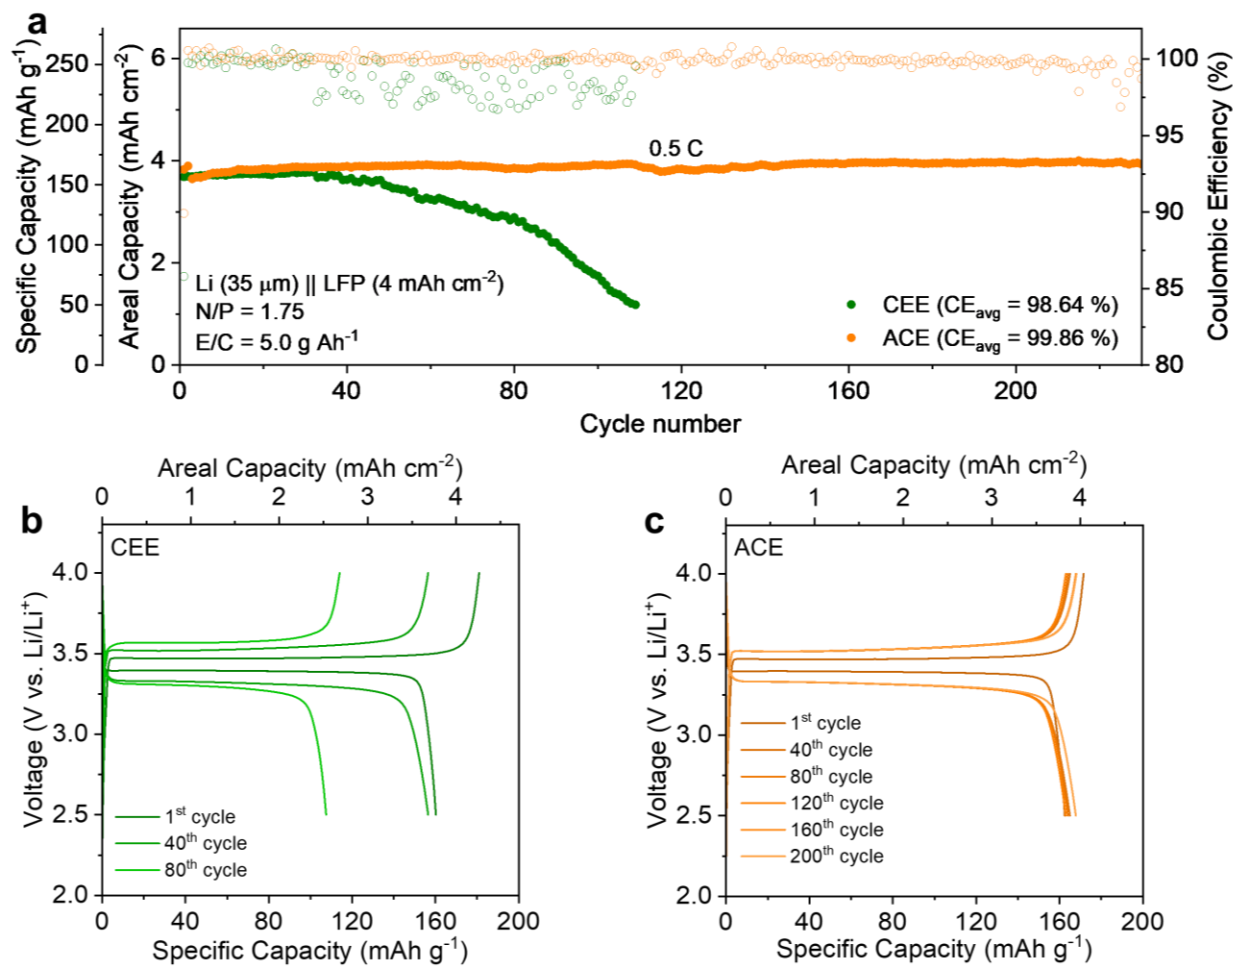

**Fig. S24.** (a) Cycling performance of Li||LFP cells under practical conditions and (b and c) corresponding voltage profiles. Conditions: the  $35 \mu\text{m}$  LMA paired with the  $4 \text{ mAh cm}^{-2}$  LFP cathode, with N/P ratio of 1.75 and E/C ratio of  $5 \text{ g Ah}^{-1}$ .

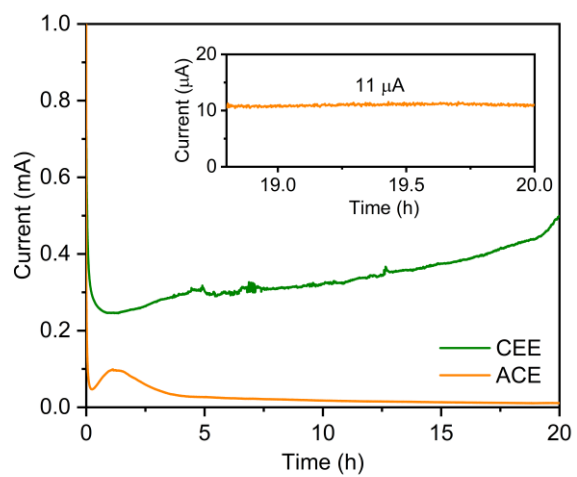

**Fig. S25.** Electrochemical floating test of Li||NCA88 cells at 4.3 V vs. Li/Li<sup>+</sup> for 20 hours.

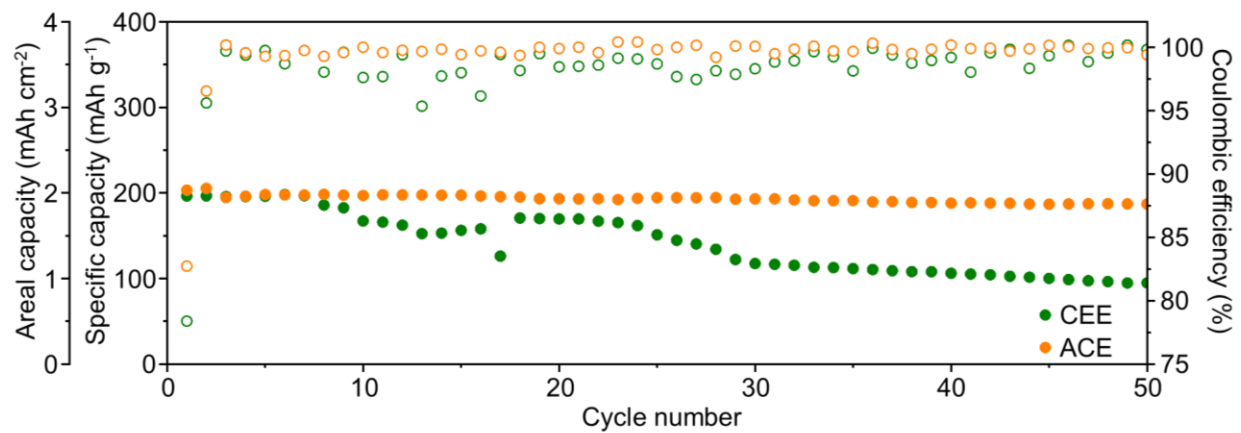

**Fig. S26.** Capacity of the NCA88 cathodes ( $2 \text{ mAh cm}^{-2}$ ) cycled at 1 C.

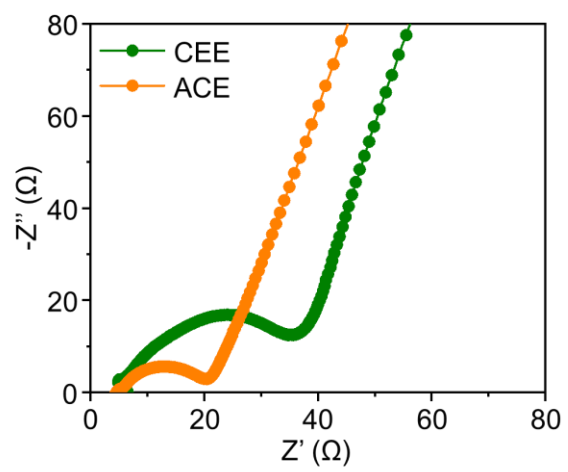

**Fig. S27.** EIS profiles of the cycled NCA88 cathodes



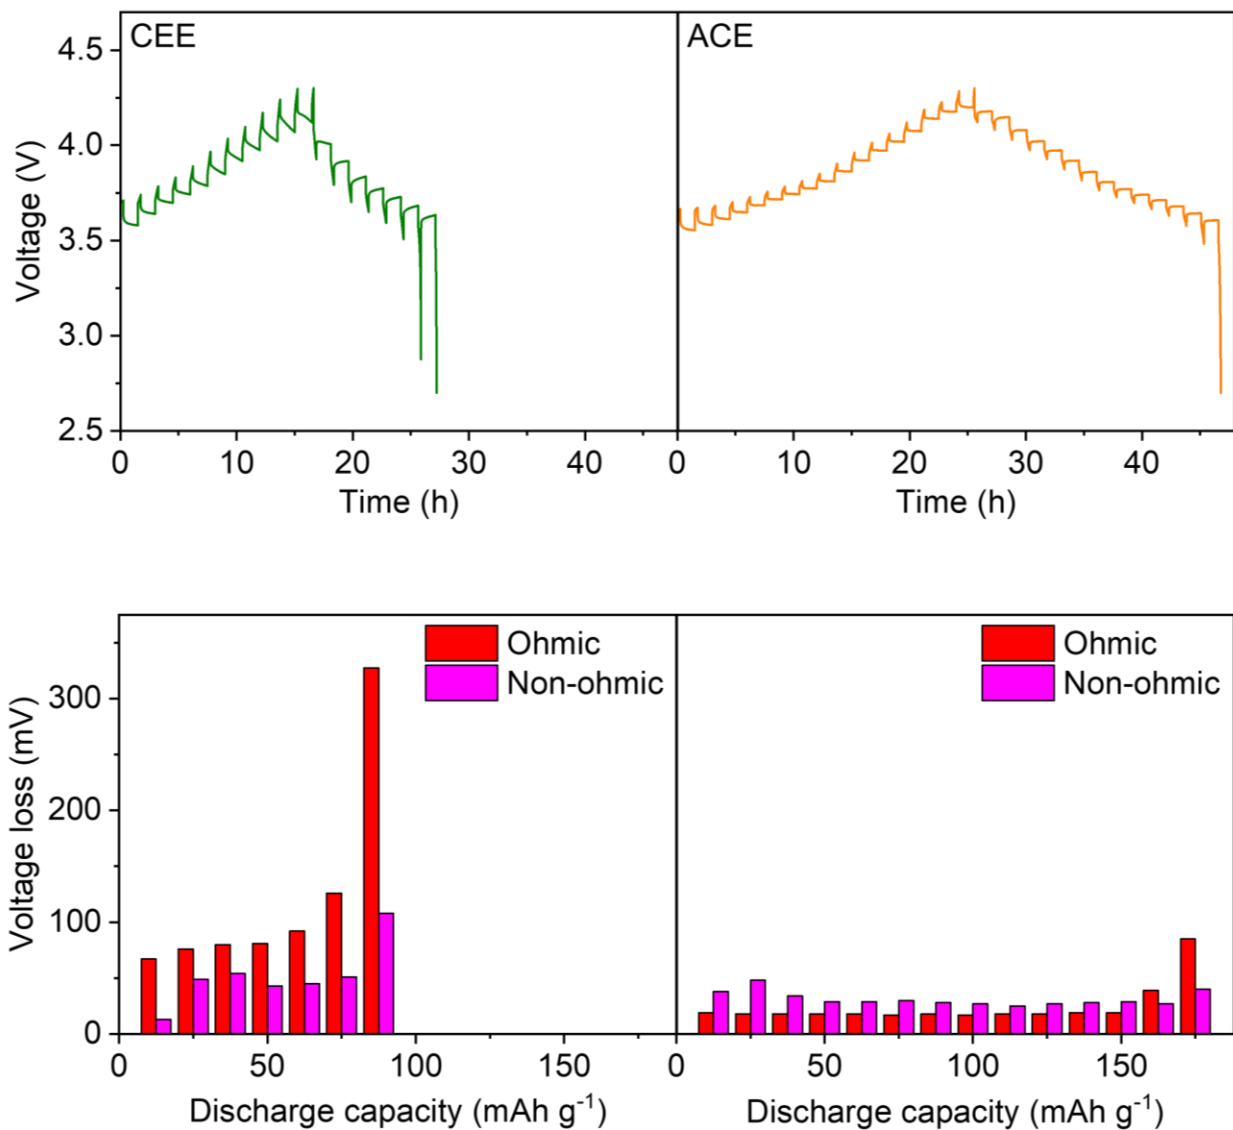

**Fig. S28.** Voltage-time profiles of GITT of cycled Li||NCA88 cells using CEE and ACE. Ohmic and non-ohmic voltage loss measured from GITT profiles as a function of discharge capacity.

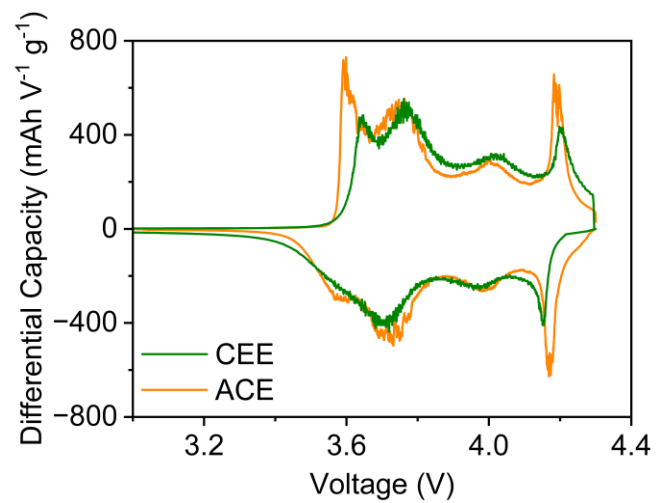

**Fig. S29.** Differential capacity as a function of voltage ( $dQ \text{ dV}^{-1}$  vs. V) of Li||NCA88 measured between 3.0 and 4.3 V.

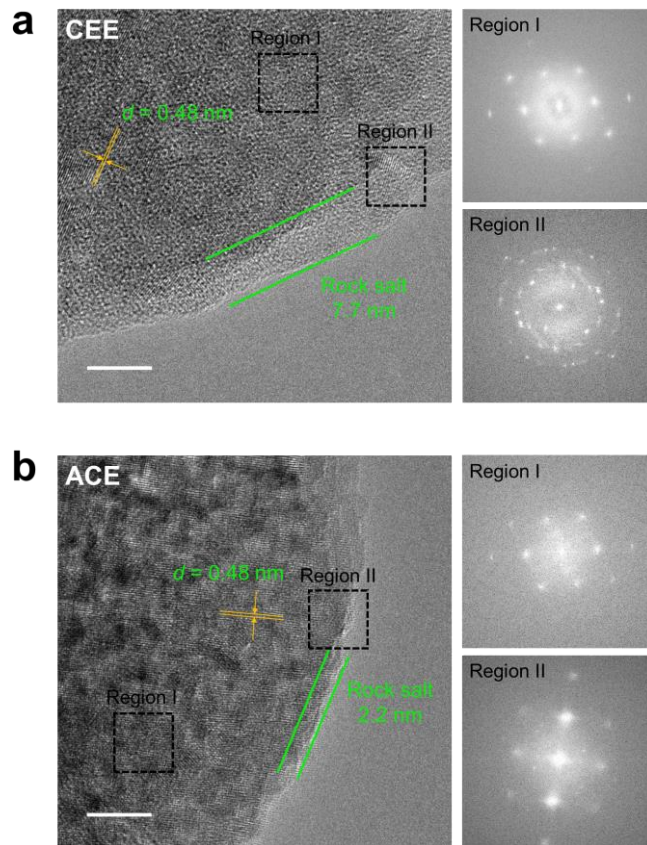

**Fig. S30.** Transmission electron microscopy images and Fourier transform of the NCA88 cathodes cycled in (a) CEE and (b) ACE. Scale bar 5 nm

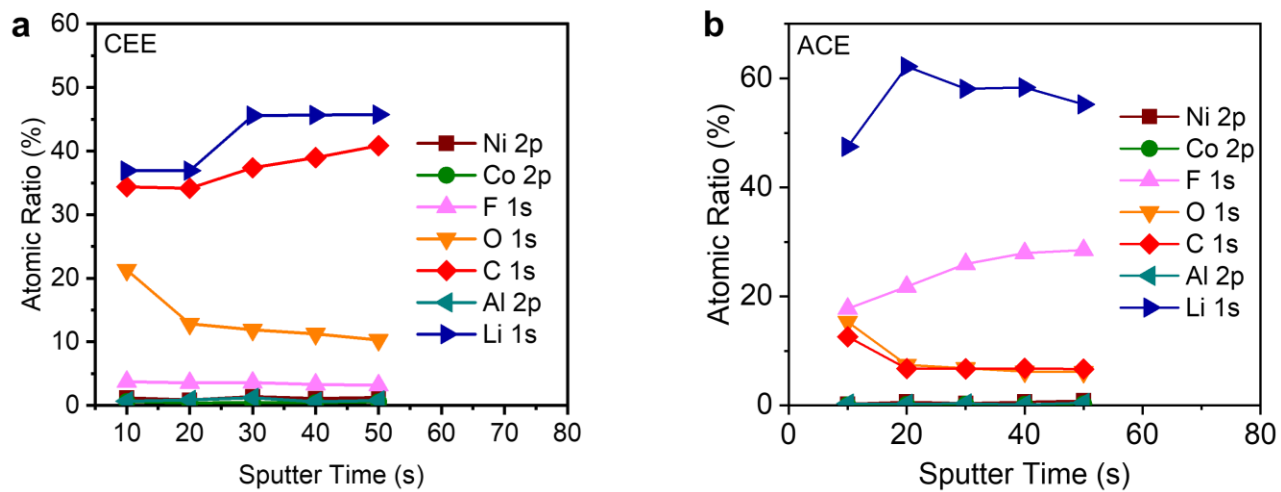

**Fig. S31.** Atomic composition ratios at different sputtering times using (a) CEE and (b) ACE.

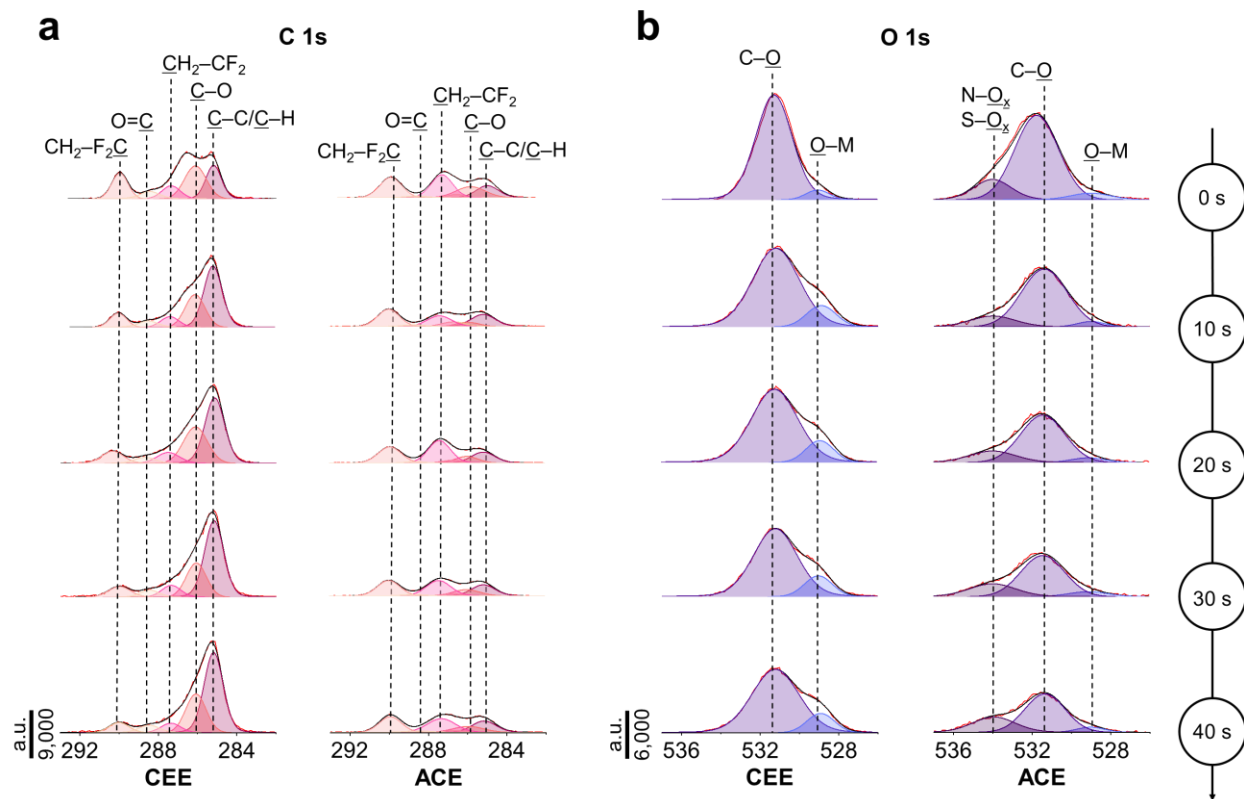

**Fig. S32.** XPS characterization of cycled NCA88. (a) C 1s and (b) O 1s spectra of CEE- and ACE-cycled NCA88 are displayed on columns, with each height corresponding to depth profiling results.

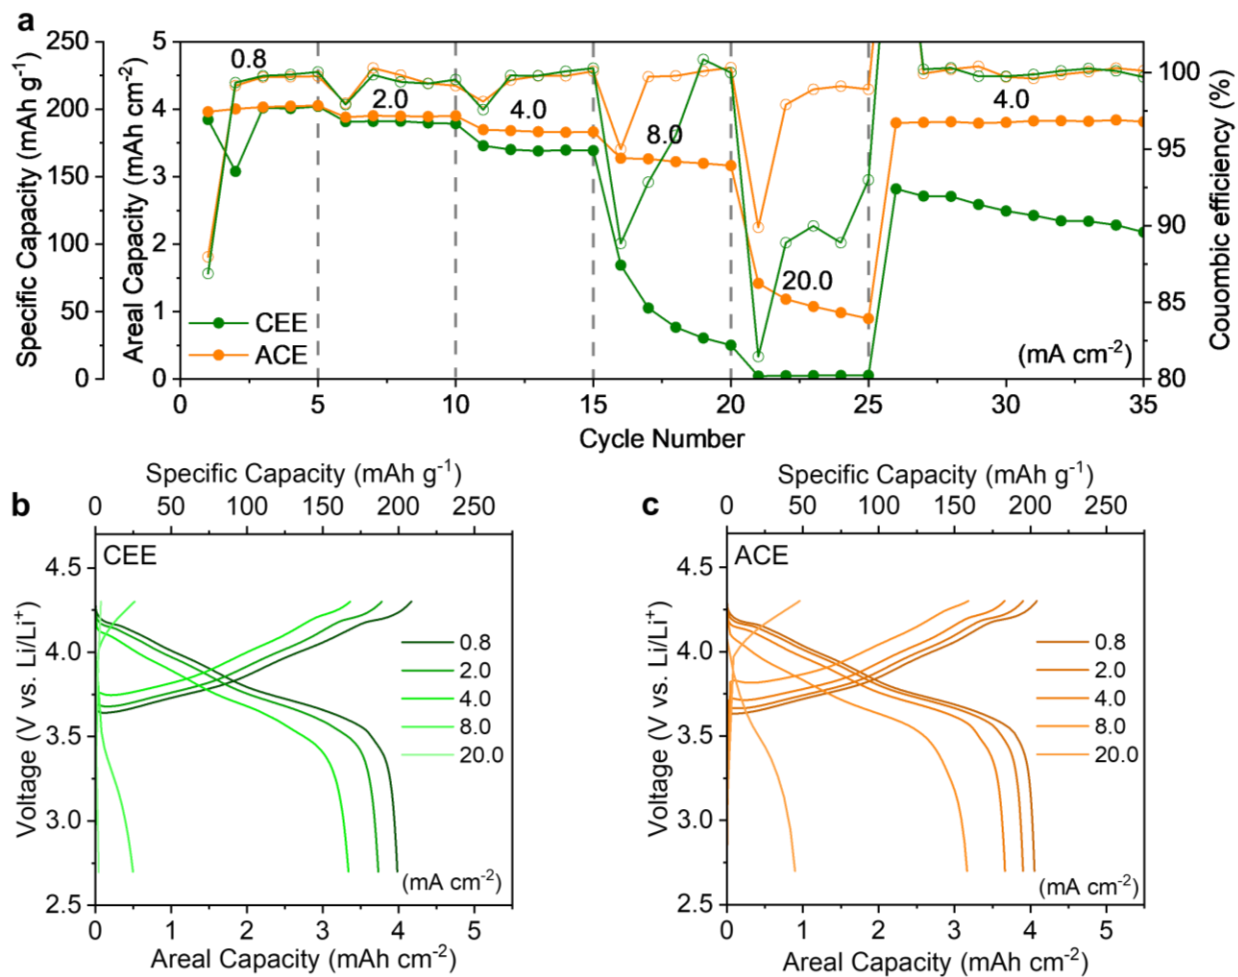

**Fig. S33.** (a) Rate performance of the NCA88 cathode and (b) and (c) corresponding voltage profiles.

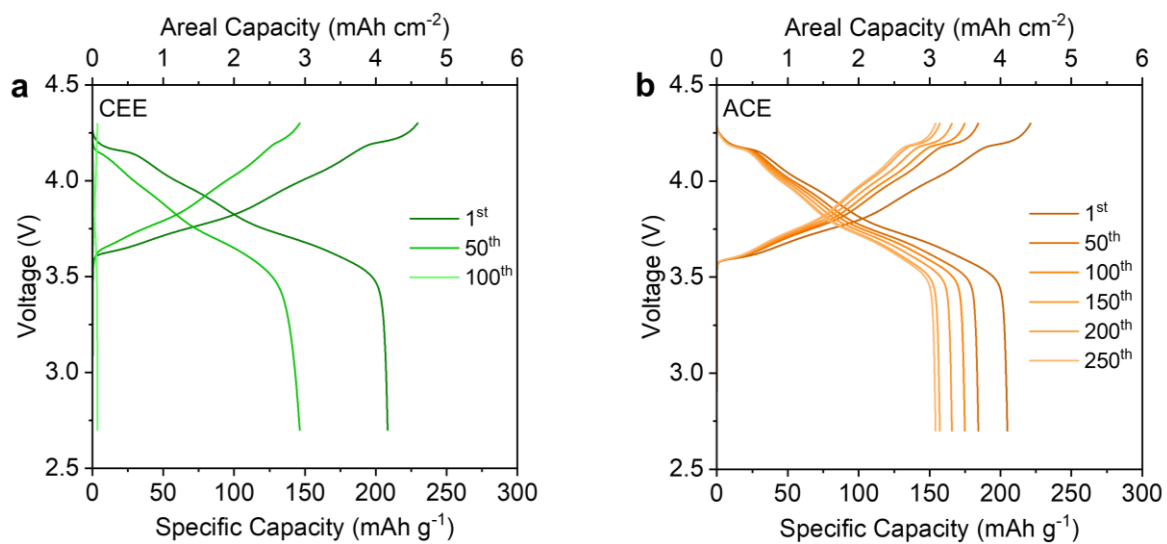

**Fig. S34.** Voltage profiles of long-term cycling of Li||NCA88 cells using (a) CEE and (b) ACE. Conditions: 50  $\mu\text{m}$  LMA paired with 2  $\text{mAh cm}^{-2}$  NCA88 cathode, with N/P ratio of 5.0 and E/C ratio of 10.2  $\text{g Ah}^{-1}$ .

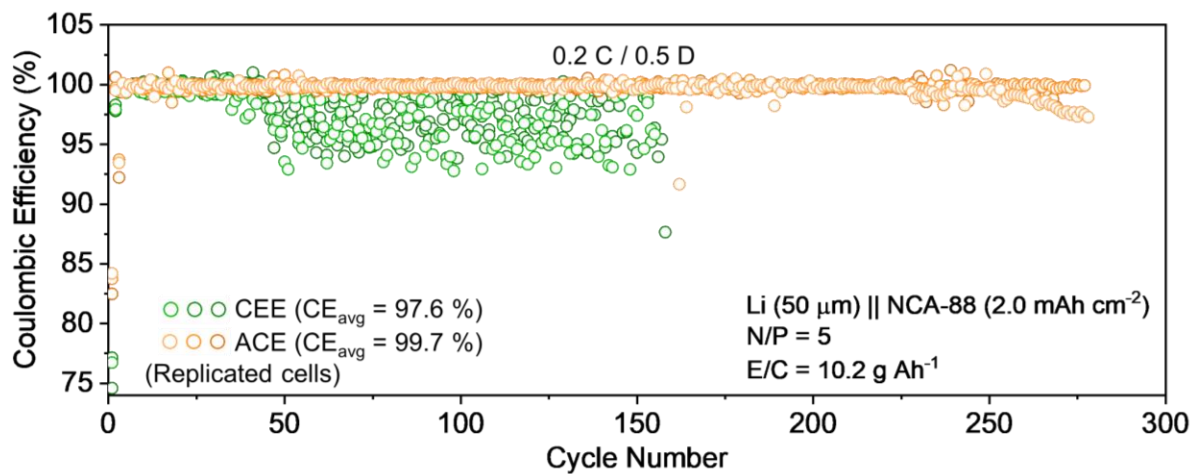

**Fig. S35.** CE of Li||NCA88 cycling performances. Conditions:  $50\ \mu\text{m}$  LMA paired with  $2\ \text{mAh cm}^{-2}$  NCA88 cathode, with N/P ratio of 5.0 and E/C ratio of  $10.2\ \text{g Ah}^{-1}$ .



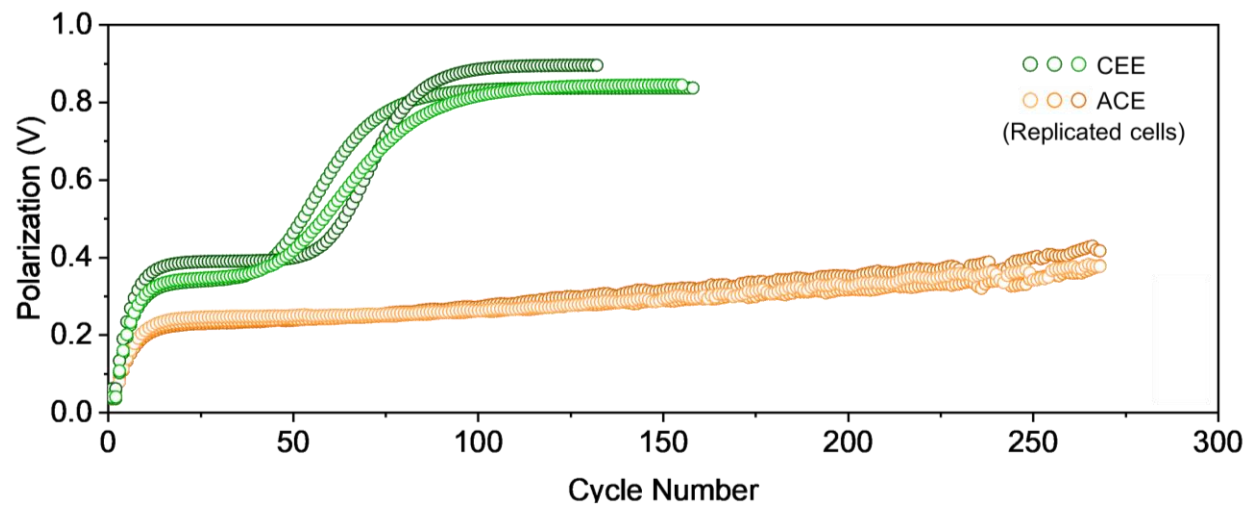

**Fig. S36.** Voltage polarization of Li||NCA88 cycling performances. Conditions: the 50  $\mu\text{m}$  LMA paired with the 2  $\text{mAh cm}^{-2}$  NCA88 cathode, with N/P ratio of 5.0 and E/C ratio of 10.2  $\text{g Ah}^{-1}$ .

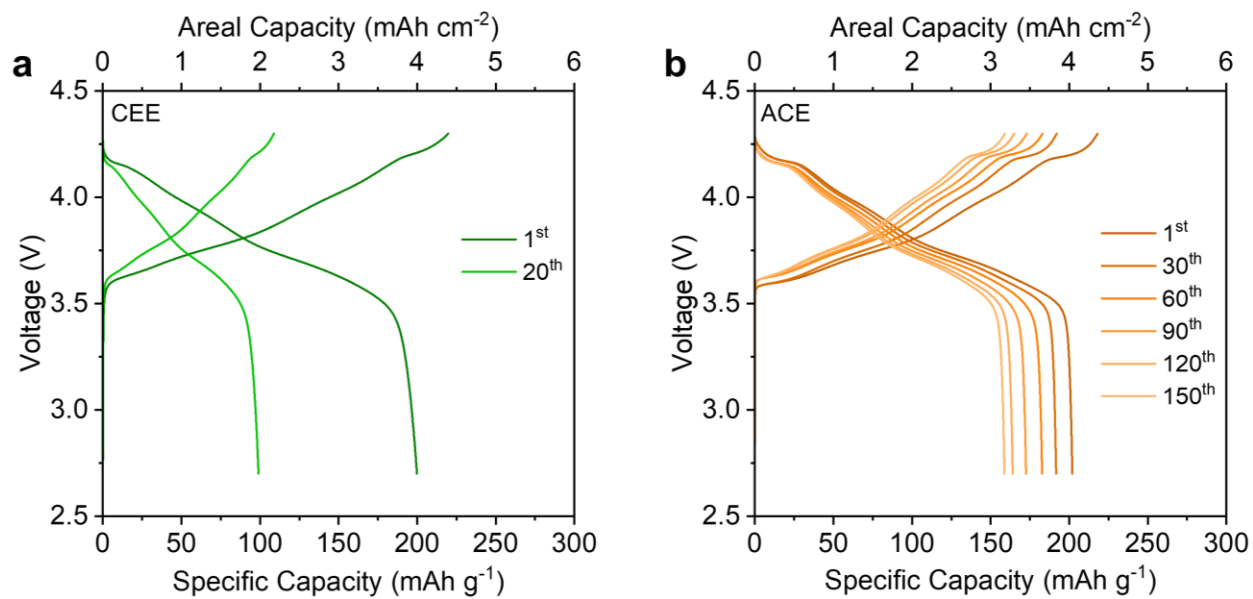

**Fig. S37.** Voltage profiles of long-term cycling of Li||NCA88 cells using (a) CEE and (b) ACE. Conditions: the 35  $\mu\text{m}$  LMA paired with the 4  $\text{mAh cm}^{-2}$  NCA88 cathode, with N/P ratio of 1.75 and E/C ratio of 5.1  $\text{g Ah}^{-1}$ .

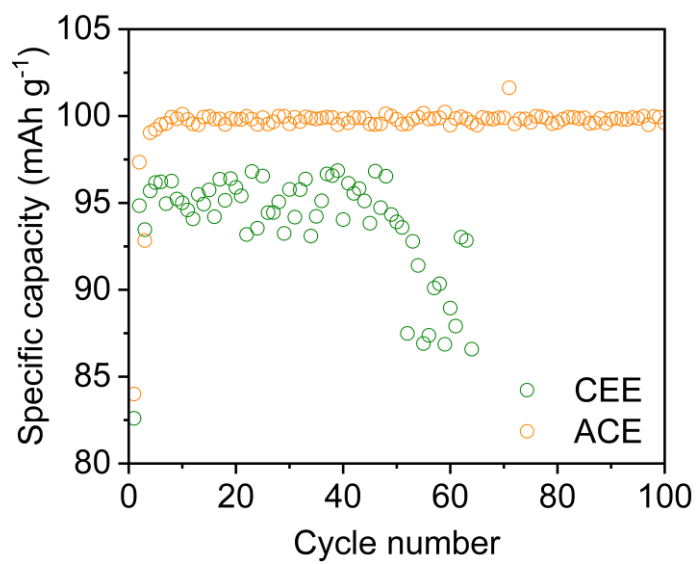

**Fig. S38.** CE of Cu||NCA88 cycling performances. Conditions: Cu paired with the 2 mAh cm<sup>-2</sup> NCA88 cathode, with E/C ratio of 5.1 g Ah<sup>-1</sup>.

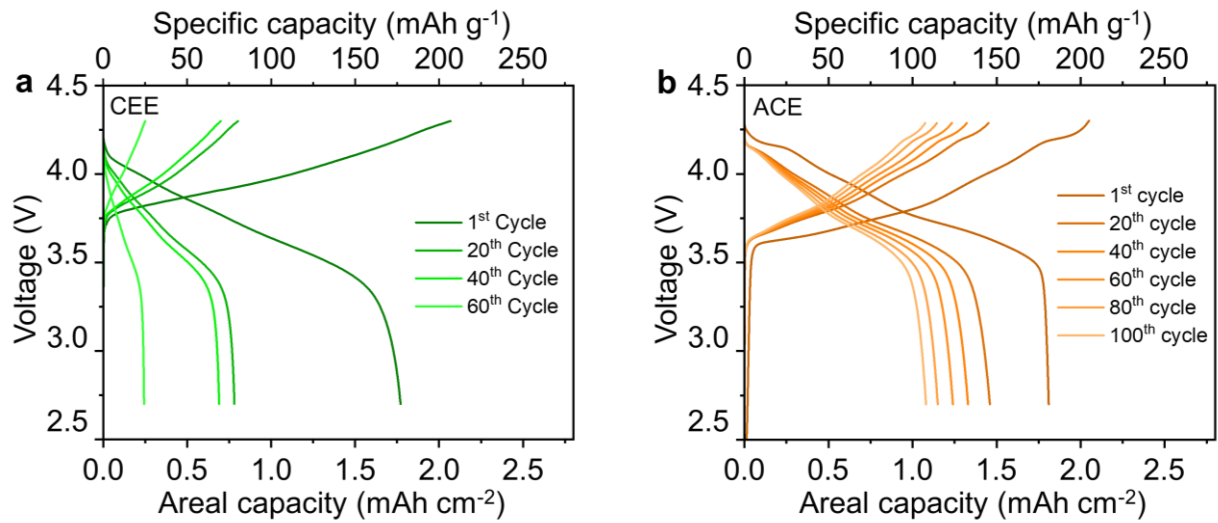

**Fig. S39.** Voltage profiles of Cu||NCA88 cycling performances. Conditions: Cu paired with the 2 mAh cm<sup>-2</sup> NCA88 cathode, with E/C ratio of 5.1 g Ah<sup>-1</sup>.

**Table S1.** Physiochemical properties and normalized cost of different solvents and diluents

| Solvent/Diluent                                                | Molecular Weight<br>(g mol <sup>-1</sup> ) | Density<br>(kg m <sup>-3</sup> ) | Normalized<br>Price (USD L <sup>-1</sup> ) |
|----------------------------------------------------------------|--------------------------------------------|----------------------------------|--------------------------------------------|
| 1,2-Dimethoxyethane (DME)                                      | 90.12                                      | 868                              | 113                                        |
| Diethyl ether (DEE)                                            | 74.12                                      | 713                              | 128                                        |
| Sulfolane (SL) / Tetramethylene sulfone (TMS)                  | 120.17                                     | 1260                             | 100.4                                      |
| Triethyl phosphite (TEP)                                       | 166.16                                     | 969                              | 53.25                                      |
| Dimethyl carbonate (DMC)                                       | 90.08                                      | 1070                             | 101                                        |
| Bis(2,2,2-trifluoroethyl) ether (BTFE)                         | 182.06                                     | 1404                             | 22600                                      |
| 1,1,2,2-Tetrafluoroethyl 2,2,3,3-tetrafluoropropyl ether (TTE) | 232.07                                     | 1533                             | 2855.2                                     |
| Tris(2,2,2-trifluoroethyl)orthoformate (TFEO)                  | 310.12                                     | 1457                             | 39800                                      |
| 2,2,3,3-tetrafluoro-1,4-dimethoxybutane (FDMB)                 | 190.14                                     | 980                              | 27200                                      |
| Fluoroethylene carbonate (FEC)                                 | 106.05                                     | 1454                             | 15860                                      |
| Methyl (2,2,2-trifluoroethyl) carbonate (FEMC)                 | 158.08                                     | 1340                             | 9000                                       |
| Tetrahydrofuran (THF)                                          | 72.11                                      | 888                              | 20.34                                      |
| 1,1,2,2-Tetrafluoroethyl 2,2,2-trifluoroethyl ether (HFE)      | 200.05                                     | 1487                             | 3000                                       |

|                                                   |        |      |       |
|---------------------------------------------------|--------|------|-------|
| N,N-Dimethylsulfamoyl fluoride (FSA)              | 127.14 | 1334 | 58100 |
| N,N-Dimethyltrifluoromethanesulfonamide (DMTMFSA) | 177.15 | 1374 | 17900 |
| 1,2-Bis(2,2-difluoroethoxy)ethane (F4DEE)         | 190.14 | 1240 | 77600 |
| Ethylene carbonate (EC)                           | 88.06  | 1321 | 49    |
| 1,3-Dioxolane (DOL)                               | 74.08  | 1060 | 191   |
| 2-Methyltetrahydrofuran (MeTHF)                   | 86.13  | 854  | 145   |
| 2,5-Dimethyltetrahydrofuran (DMeTHF)              | 100.16 | 833  | 8760  |
| Dimethoxymethane (DMM)                            | 76.09  | 860  | 216   |

**Table S2.** Physiochemical properties and normalized cost of different salts

| Solvent/Diluent                                  | Molecular Weight<br>(g mol <sup>-1</sup> ) | Density<br>(kg m <sup>-3</sup> ) | Normalized<br>Price (USD kg <sup>-1</sup> ) |
|--------------------------------------------------|--------------------------------------------|----------------------------------|---------------------------------------------|
| Lithium Bis(fluorosulfonyl)imide (LiFSI)         | 187.07                                     | 1052                             | 6780                                        |
| Lithium Hexafluorophosphate (LiPF <sub>6</sub> ) | 151.91                                     | 1500                             | 4700                                        |
| Lithium Bis-trifluoromethanesulfonimide (LiTFSI) | 287.07                                     | 1333                             | 5180                                        |
| Lithium difluoro(oxalato)borate (LiDFOB)         | 143.77                                     | 2120                             | 4780                                        |
| Lithium nitrate (LiNO <sub>3</sub> )             | 68.95                                      | 2380                             | 1640                                        |
| Tetrabutylammonium tetrafluoroborate (TBATFB)    | 329.27                                     | 1036                             | 2580                                        |

**Table S3.** Comparison of the state-of-the-art Li||Cu coulombic efficiencies

| Comparison Reference | Electrolyte                                                                  | Li  Cu Coulombic Efficiency (%) | Current density (mA cm <sup>-2</sup> ) | Capacity (mAh cm <sup>-2</sup> ) | Electrolyte Cost (USD L <sup>-1</sup> ) |
|----------------------|------------------------------------------------------------------------------|---------------------------------|----------------------------------------|----------------------------------|-----------------------------------------|
| S1                   | 1 M LiFSI DEE <sup>6</sup>                                                   | 99.0                            | 0.5                                    | 1                                | 1400.60                                 |
| S2                   | 0.5 M LiFSI + 0.5 M LiTFSI DME:DOL (1:1) <sup>7</sup>                        | 99.0                            | 0.25                                   | 0.625                            | 1531.89                                 |
| S3                   | 1 M LiTFSI DME:DOL (1:1) + 3 wt% LiNO <sub>3</sub> <sup>8</sup>              | 98.5                            | 0.5                                    | 1                                | 1673.07                                 |
| S4                   | 4 M LiFSI DEE <sup>9</sup>                                                   | 99.38                           | 0.5                                    | 1                                | 5218.42                                 |
| S5                   | 4 M LiFSI DME <sup>9</sup>                                                   | 99.04                           | 0.5                                    | 1                                | 5203.42                                 |
| S6                   | 3.85 M LiFSI THF <sup>10</sup>                                               | 98.5                            | 1                                      | 2                                | 4919.87                                 |
| S7                   | 1 M LiFSI DME:FDMH (1:6) <sup>11</sup>                                       | 99.4                            | 0.5                                    | 1                                | 24604.59                                |
| S8                   | LiFSI:DME:TTE (1:1.2:3) <sup>12</sup>                                        | 99.3                            | 0.5                                    | 1                                | 4508.50                                 |
| S9                   | 1 M LiFSI DMeTHF <sup>13</sup>                                               | 98.4                            | 1                                      | 1                                | 10032.61                                |
| S10                  | 1 M LiFSI MeTHF <sup>13</sup>                                                | 98.2                            | 1                                      | 1                                | 1417.61                                 |
| S11                  | 1 M LiFSI + 1 M LiTFSI DOL:DME (1:4) + 0.02 M KPBS <sup>14</sup>             | 99.1                            | 1                                      | 1                                | 2911.78                                 |
| S12                  | 2 M LiFSI + 1 M LiTFSI DOL:DME (1:1) + 3 wt% LiNO <sub>3</sub> <sup>15</sup> | 98.5                            | 0.5                                    | 1                                | 4398.96                                 |



|                  |                                             |             |          |          |                 |
|------------------|---------------------------------------------|-------------|----------|----------|-----------------|
| S13              | 1 M LiFSI FDMB <sup>16</sup>                | 99.2        | 0.25     | 0.5      | 28472.61        |
| S14              | 4.86 M LiFSI THF <sup>17</sup>              | 99.3        | 1        | 1        | 6205.20         |
| S15              | 2.43 M LiFSI<br>THF:TTE (1:1) <sup>17</sup> | 99.4        | 1        | 1        | 4530.20         |
| S16              | 1.5 M LiFSI DME <sup>18</sup>               | 96.7        | 0.5      | 0.5      | 2021.91         |
| S17              | 1.5 M LiFSI DMM <sup>18</sup>               | 99.1        | 0.5      | 0.5      | 2124.91         |
| S18              | 3 M LiFSI DME <sup>19</sup>                 | 99          | 0.5      | 1        | 3930.82         |
| S19              | 1.2 M LiFSI F4DEE <sup>20</sup>             | 99.74       | 0.5      | 1        | 79127.13        |
| <b>This work</b> | <b>1 M LiFSI + 0.1 M<br/>TBATFB THF</b>     | <b>99.4</b> | <b>1</b> | <b>1</b> | <b>1377.894</b> |
| <b>This work</b> | <b>1 M LiFSI + 0.1 M<br/>TBATFB THF</b>     | <b>99.2</b> | <b>3</b> | <b>3</b> | <b>1377.894</b> |

**Table S4.** Comparison of the state-of-the-art Li metal battery performances.

| Comparison Reference | Electrolyte                                           | Cycle number | Capacity retention | E/C ratio  | N/P ratio   | Practicality factor | Electrolyte Cost (USD L <sup>-1</sup> ) |
|----------------------|-------------------------------------------------------|--------------|--------------------|------------|-------------|---------------------|-----------------------------------------|
| 4                    | 1 M LiFSI DEE <sup>6</sup>                            | 182          | 80                 | 8          | 2           | 16                  | 5218.42                                 |
| 5                    | 0.5 M LiFSI + 0.5 M LiTFSI DME:DOL (1:1) <sup>7</sup> | 94           | 80                 | 8          | 2           | 16                  | 5203.42                                 |
| 7                    | 1 M LiFSI DME:FDMH (1:6) <sup>11</sup>                | 250          | 76                 | 10         | 2           | 20                  | 24604.59                                |
| 8                    | LiFSI:DME:TTE (1:1.2:3) <sup>12</sup>                 | 155          | 80                 | 3          | 2.48        | 7.44                | 4508.50                                 |
| 19                   | 1.2 M LiFSI F4DEE <sup>20</sup>                       | 200          | 80                 | 8          | 2.125       | 17                  | 79127.13                                |
| 20                   | LiFSI:THF:TTE (1:2.6:3.2) <sup>21</sup>               | 160          | 80.7               | 37.5       | 45          | 1687.5              | 3560.83                                 |
| <b>This work</b>     | <b>1 M LiFSI + 0.1 M TBATFB THF</b>                   | <b>150</b>   | <b>82.4</b>        | <b>5.1</b> | <b>1.75</b> | <b>8.925</b>        | <b>1377.89</b>                          |
| <b>This work</b>     | <b>1 M LiFSI + 0.1 M TBATFB THF</b>                   | <b>250</b>   | <b>79.4</b>        | <b>4</b>   | <b>5</b>    | <b>20</b>           | <b>1377.89</b>                          |

## References

1. G. Kresse and J. Hafner, *Phys. Rev. B Condens. Matter*, 1993, **47**, 558-561.
2. G. Kresse and J. Furthmuller, *Phys. Rev. B*, 1996, **54**, 11169-11186.
3. P. E. Blochl, *Phys. Rev. B*, 1994, **50**, 17953-17979.
4. J. P. Perdew, K. Burke and M. Ernzerhof, *Phys. Rev. Lett.*, 1996, **77**, 3865-3868.
5. C. Chen and S. P. Ong, *Nat. Comput. Sci.*, 2022, **2**, 718-728.
6. J. Holoubek, H. Liu, Z. Wu, Y. Yin, X. Xing, G. Cai, S. Yu, H. Zhou, T. A. Pascal, Z. Chen and P. Liu, *Nat. Energy*, 2021, **6**, 303-313.
7. R. R. Miao, J. Yang, X. J. Feng, H. Jia, J. L. Wang and Y. N. Nuli, *J. Power Sources*, 2014, **271**, 291-297.
8. S. Y. Yuan, S. T. Weng, F. Wang, X. L. Dong, Y. G. Wang, Z. X. Wang, C. Shen, J. L. Bao, X. F. Wang and Y. Y. Xia, *Nano Energy*, 2021, **83**, 105847.
9. Y. L. Chen, Z. Yu, P. Rudnicki, H. X. Gong, Z. J. Huang, S. C. Kim, J. C. Lai, X. Kong, J. Qin, Y. Cui and Z. N. Bao, *J. Am. Chem. Soc.*, 2021, **143**, 18703-18713.
10. T. D. Pham, A. Bin Faheem and K. K. Lee, *Small*, 2021, **17**, 2103375.
11. H. Wang, Z. Yu, X. Kong, W. Huang, Z. Zhang, D. G. Mackanic, X. Huang, J. Qin, Z. Bao and Y. Cui, *Adv. Mater.*, 2021, **33**, 2008619.
12. X. Ren, L. Zou, X. Cao, M. H. Engelhard, W. Liu, S. D. Burton, H. Lee, C. Niu, B. E. Matthews, Z. Zhu, C. Wang, B. W. Arey, J. Xiao, J. Liu, J-G. Zhang and W. Xu, *Joule*, 2019, **3**, 1662-1676.
13. R. Xu, J. F. Ding, X. X. Ma, C. Yan, Y. X. Yao and J. Q. Huang, *Adv. Mater.*, 2021, **33**, 2105962.
14. D. D. Wang, H. D. Liu, M. Q. Li, D. W. Xia, J. Holoubek, Z. Deng, M. Y. Yu, J. H. Tian, Z. Q. Shan, S. P. Ong, P. Liu and Z. Chen, *Nano Energy*, 2020, **75**, 104889.
15. F. L. Qiu, X. Li, H. Deng, D. Wang, X. W. Mu, P. He and H. S. Zhou, *Adv. Energy Mater.*, 2019, **9**, 1803372.
16. Z. Yu, H. Wang, X. Kong, W. Huang, Y. Tsao, D. G. Mackanic, K. C. Wang, X. Wang, W. Huang, S. Choudhury, Y. Zheng, C. V. Amanchukwu, S. T. Hung, Y. Ma, E. G. Lomeli, J. Qin, Y. Cui and Z. Bao, *Nat. Energy*, 2020, **5**, 526-533.
17. T. Chen, J. You, R. Li, H. Li, Y. Wang, C. Wu, Y. Sun, L. Yang, Z. Ye, B. Zhong, Z. Wu and X. Guo, *Adv. Sci.*, 2022, **9**, 2203216.

18. S. Ko, T. Obukata, T. Shimada, N. Takenaka, M. Nakayama, A. Yamada and Y. Yamada, *Nat. Energy*, 2022, **7**, 1217-1224.
19. J. Moon, D. O. Kim, L. Bekaert, M. Song, J. Chung, D. Lee, A. Hubin and J. Lim, *Nat. Commun.*, 2022, **13**, 4538.
20. Z. Yu, P. E. Rudnicki, Z. Zhang, Z. Huang, H. Celik, S. T. Oyakhire, Y. Chen, X. Kong, S. C. Kim, X. Xiao, H. Wang, Y. Zheng, G. A. Kamat, M. S. Kim, S. F. Bent, J. Qin, Y. Cui and Z. Bao, *Nat. Energy*, 2022, **7**, 94-106.
21. Y. Lin, Z. Yang, X. Zhang, Y. Liu, G. Hu, S. Chen and Y. Zhang, *Energy Storage Mater.*, 2023, **58**, 184-194.
